# Supplementary material for: A Pan-Inhibitor for Protein Arginine Methyltransferase Family Enzymes
Source: MDPI journal article supplement (doi:10.3390/biom11060854), 2021-06-08

*Supplementary Materials*

# **A Pan-Inhibitor for Protein Arginine Methyltransferase Family Enzymes**

**Iredia D. Iyamu<sup>1</sup>, Ayad A. Al-Hamashi<sup>1,2</sup> and Rong Huang<sup>1,\*</sup>**

<sup>1</sup> Department of Medicinal Chemistry and Molecular Pharmacology, Center for Cancer Research, Institute for Drug Discovery, Purdue University, West Lafayette, Indiana 47907, United States

<sup>2</sup> Department of Pharmaceutical Chemistry, College of Pharmacy, University of Baghdad, Bab-almoadham, Baghdad, 10047, Iraq

\* Correspondence: [huang-r@purdue.edu](mailto:huang-r@purdue.edu) Tel.: +001 765 494 3426

**NMR spectra, HRMS and HPLC analysis of compounds 6a-6n**

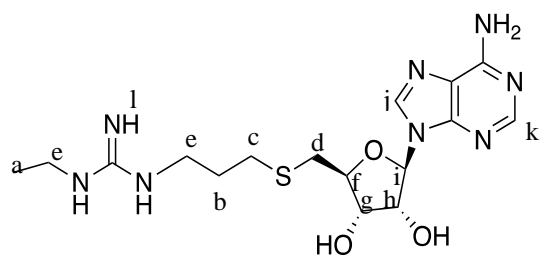

**6a**

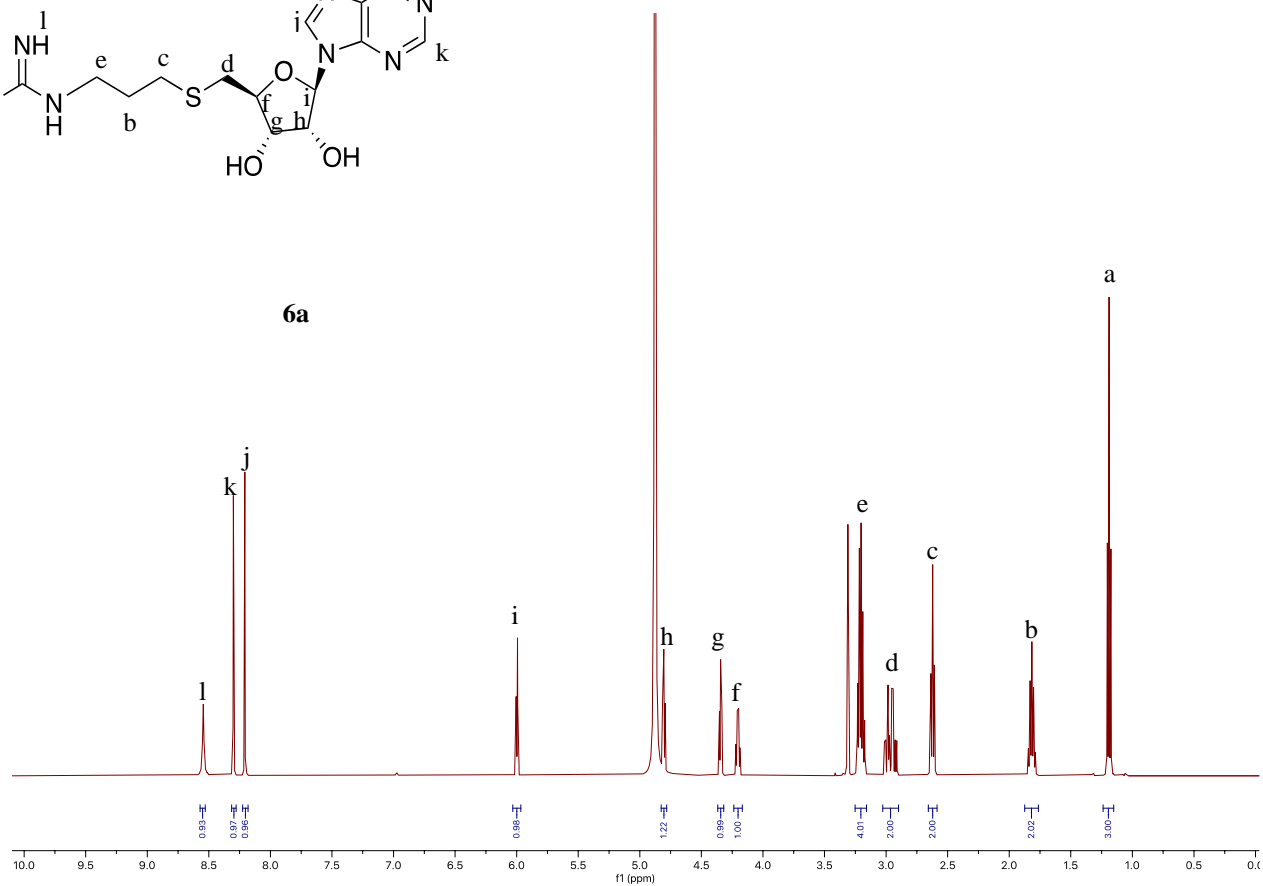

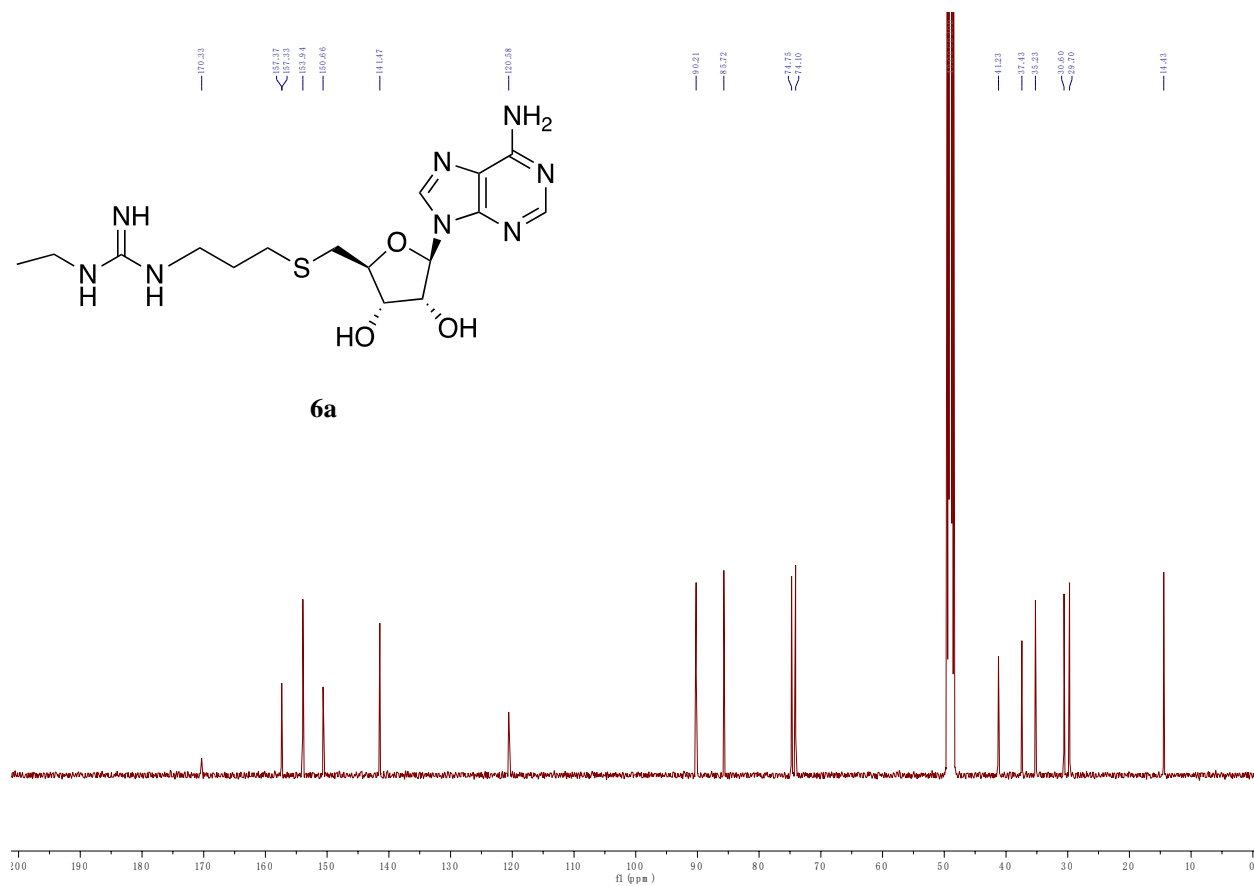

HRMS Spectra of 6a

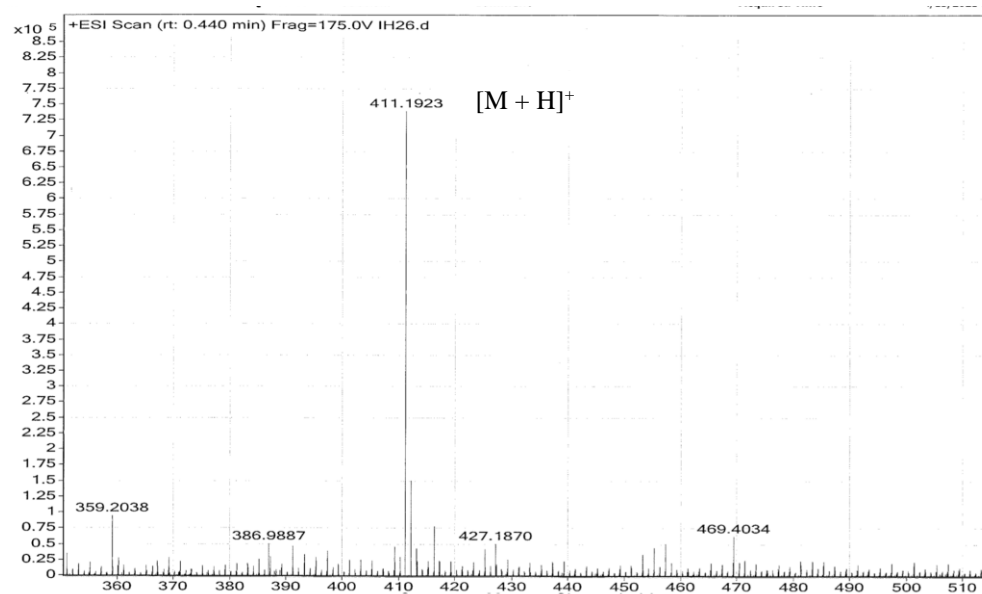

HPLC Spectra of 6a

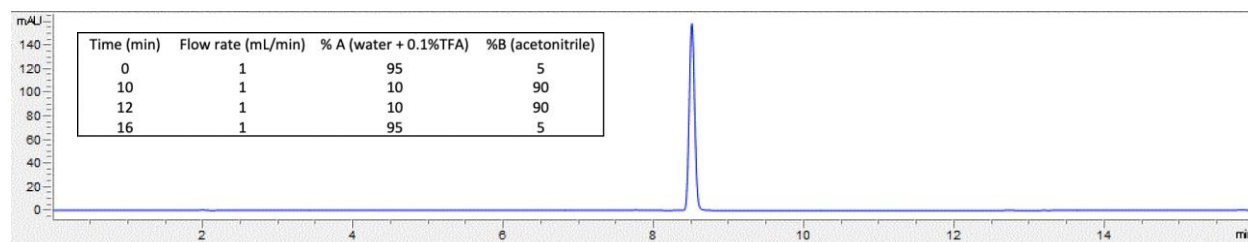

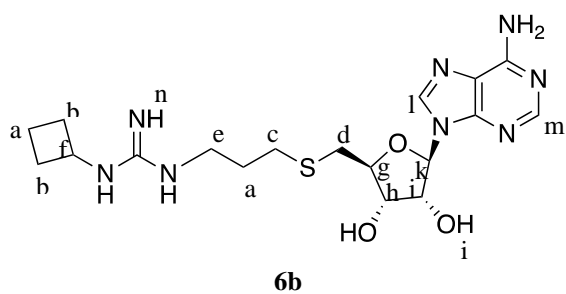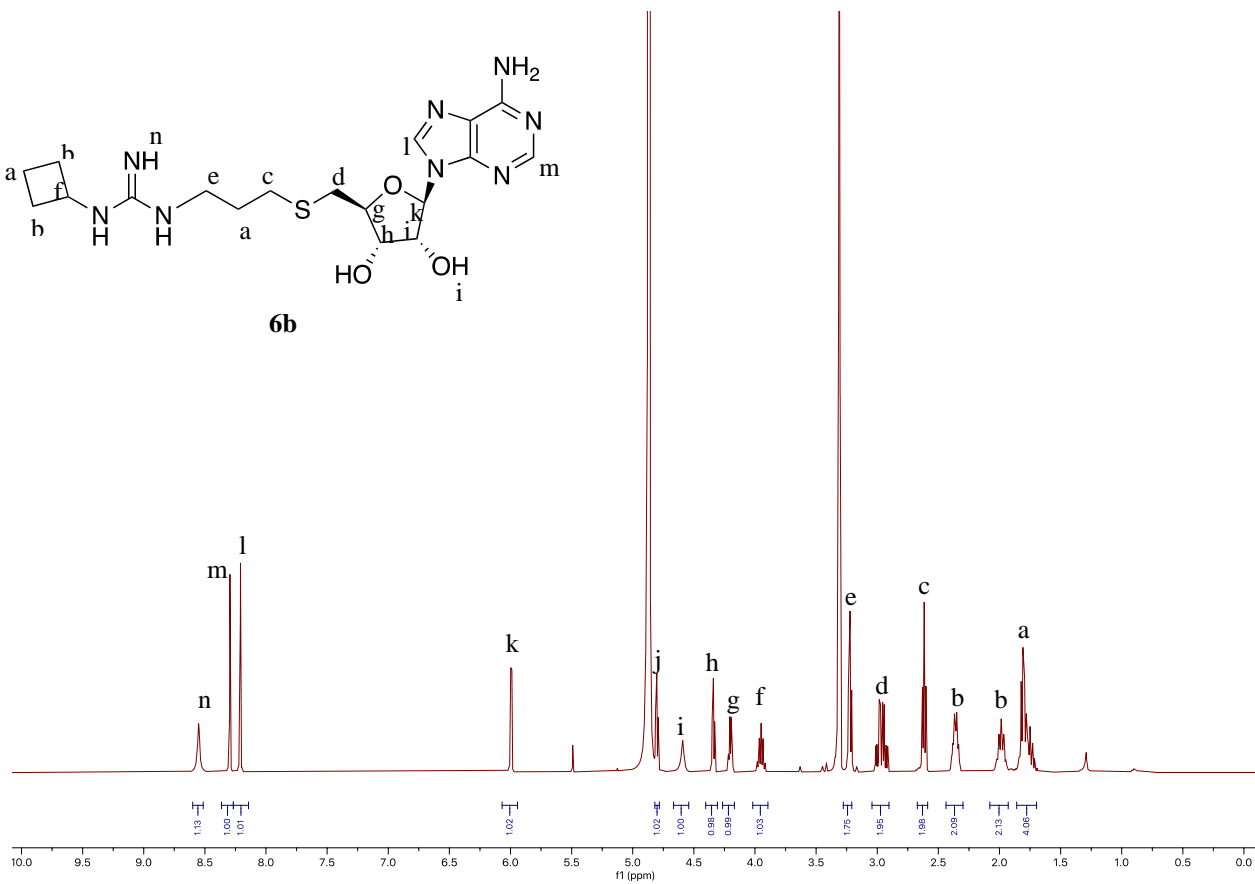

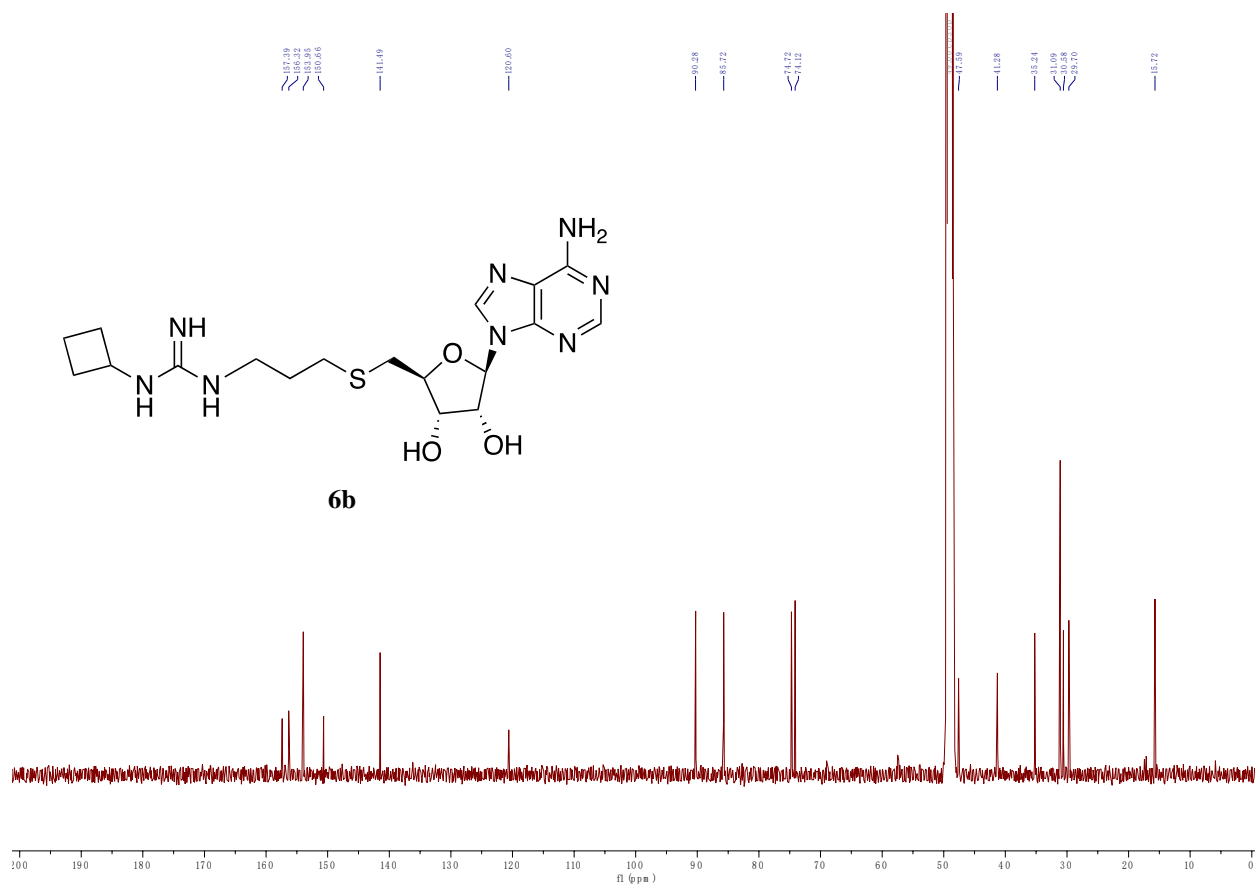

HRMS Spectra of 6b

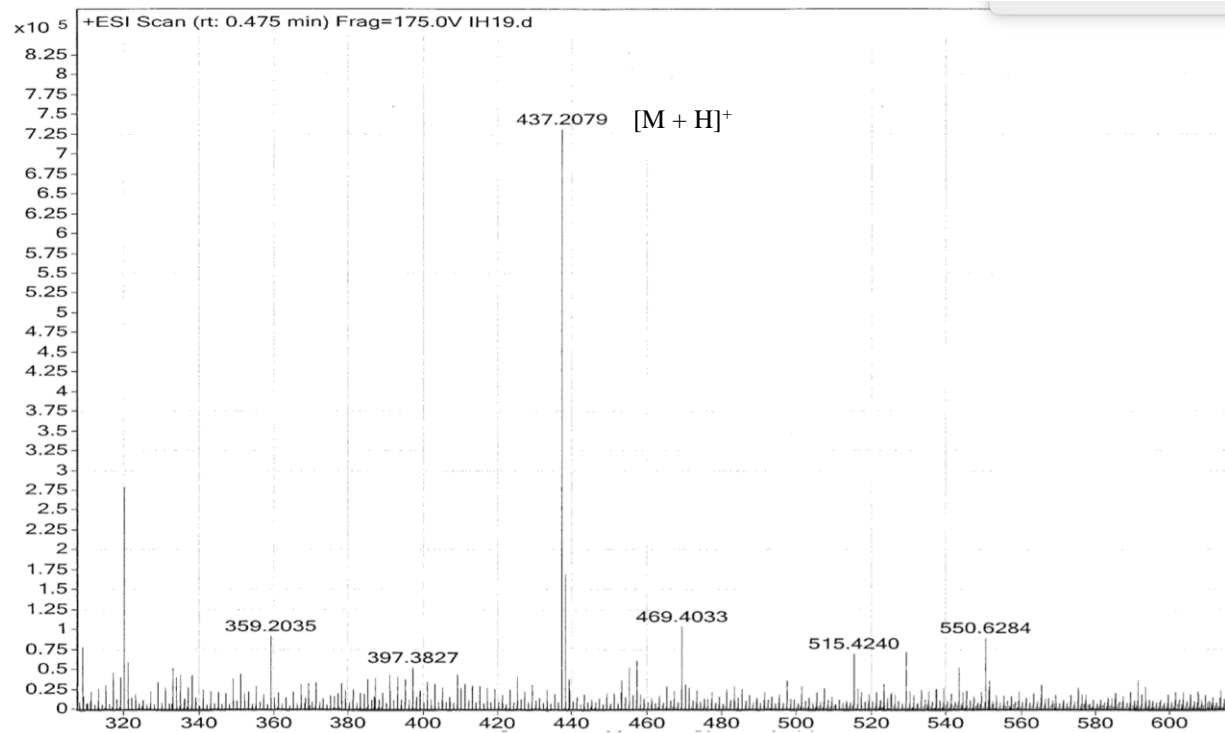

HPLC Spectra of 6b

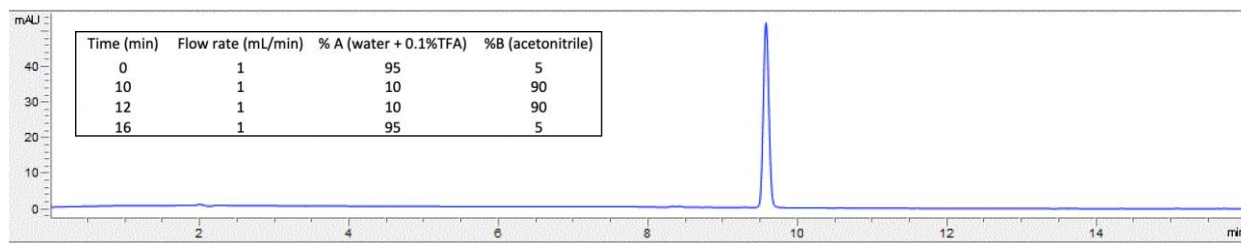

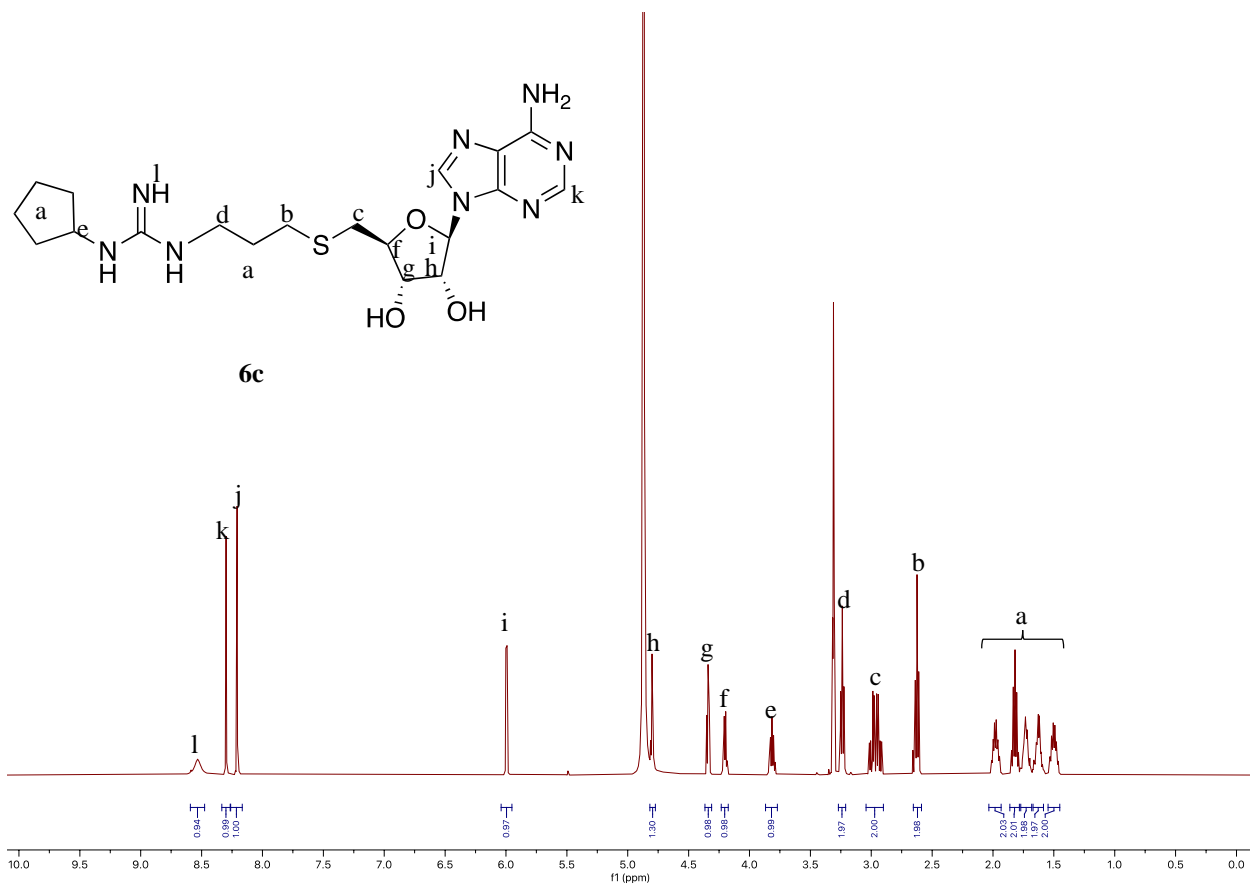



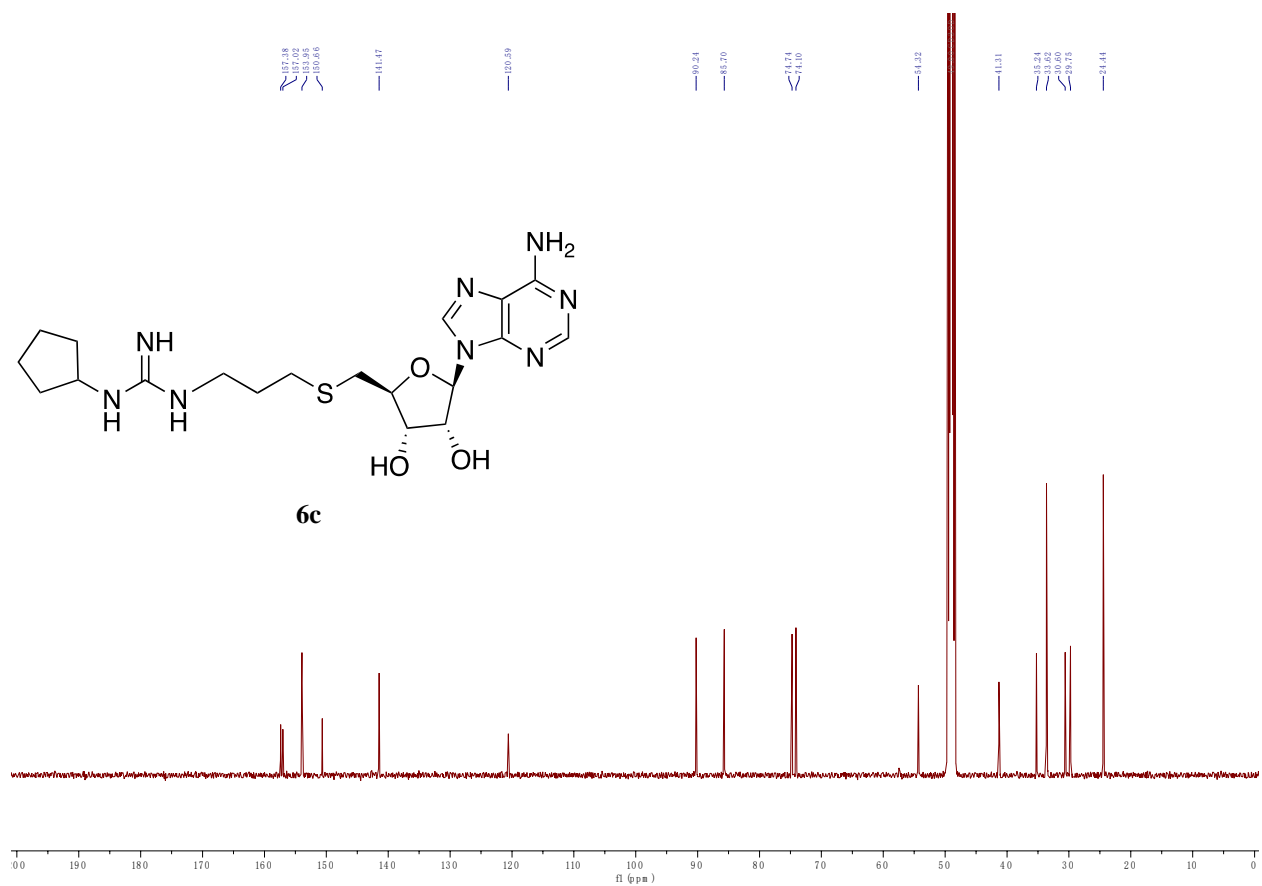

HRMS Spectra of **6c**

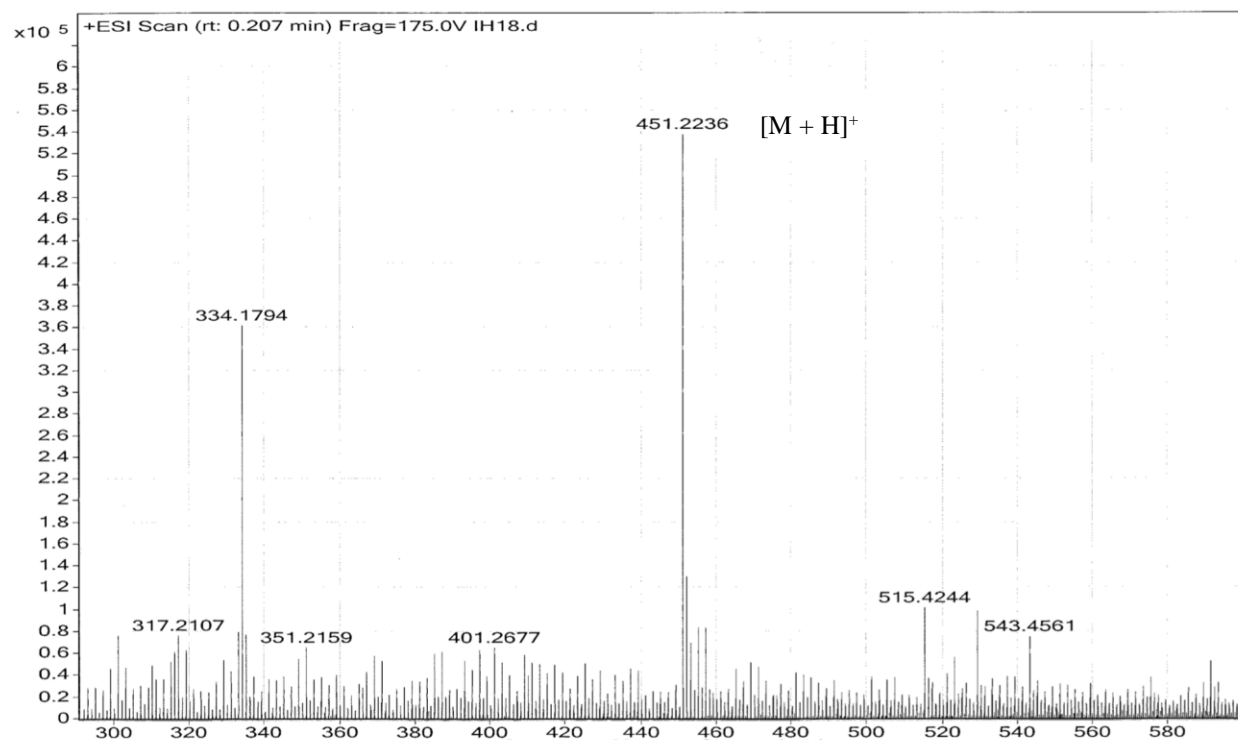

HPLC Spectra of 6c

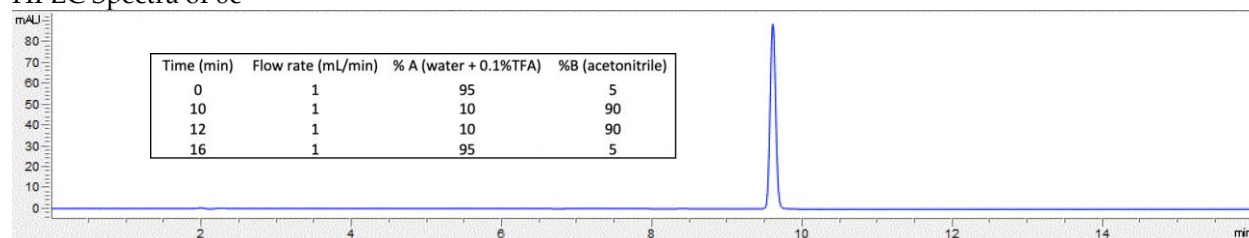

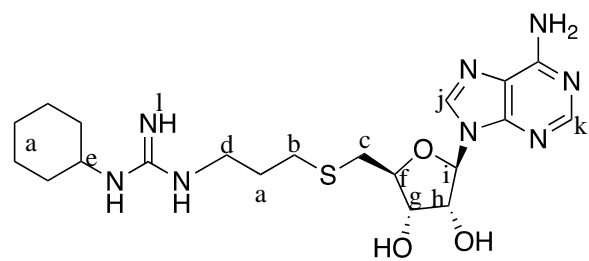

**6d**

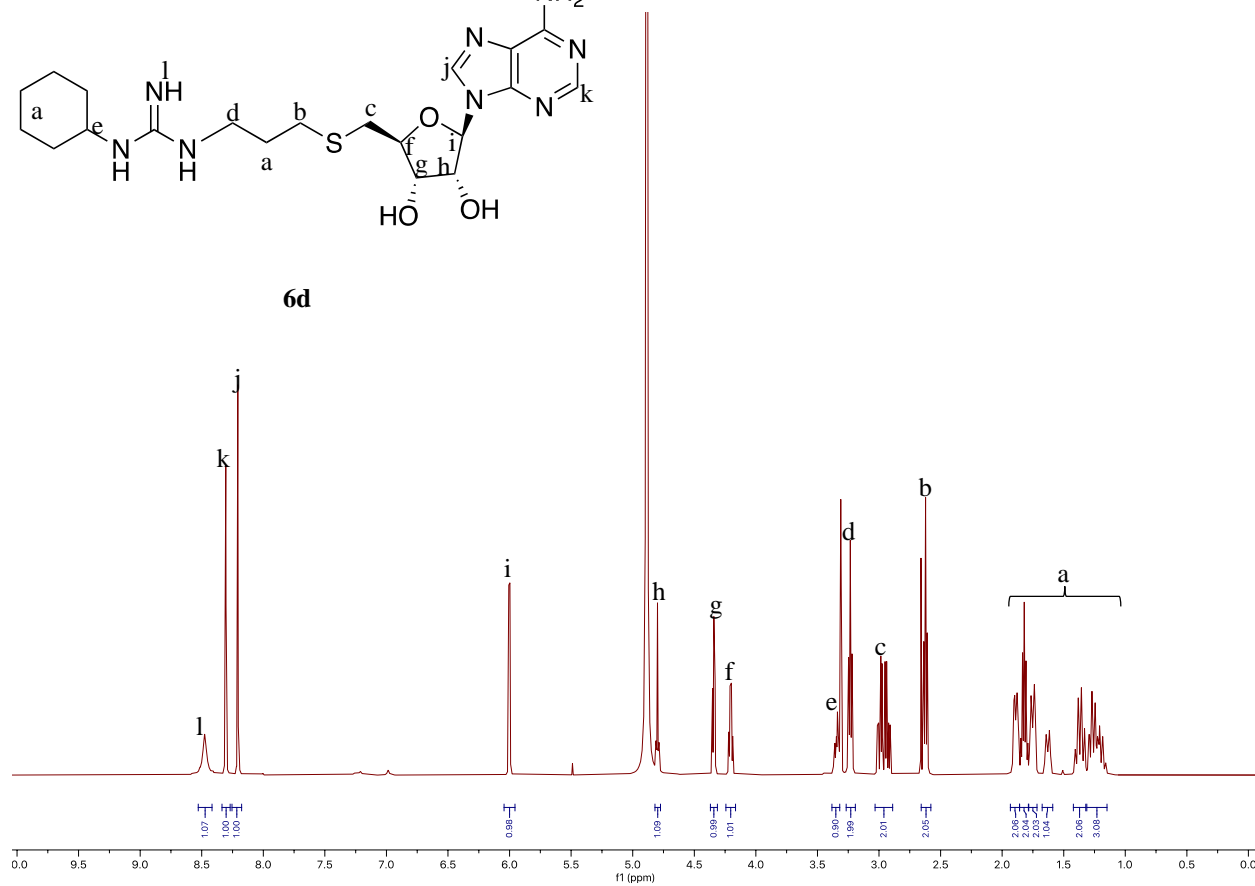

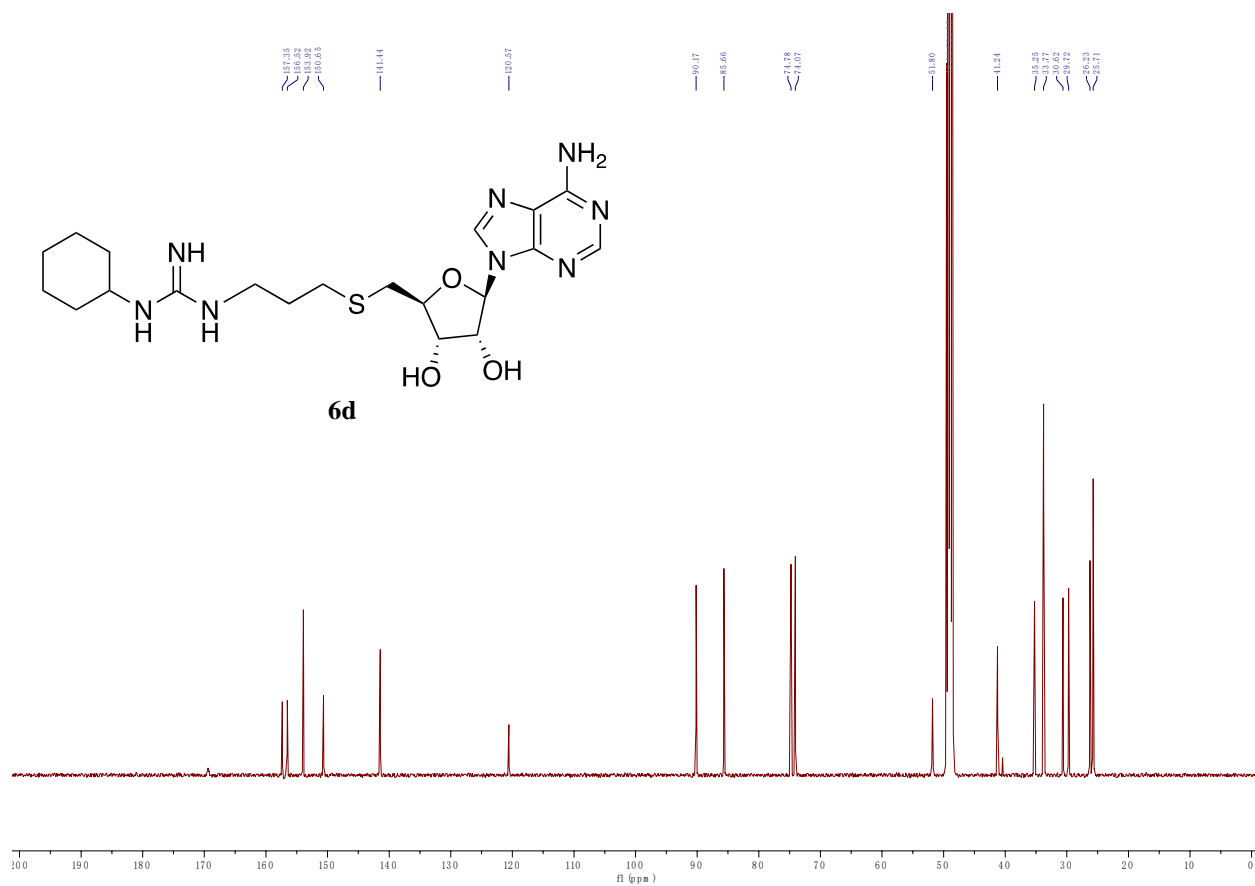

HRMS Spectra of **6d**

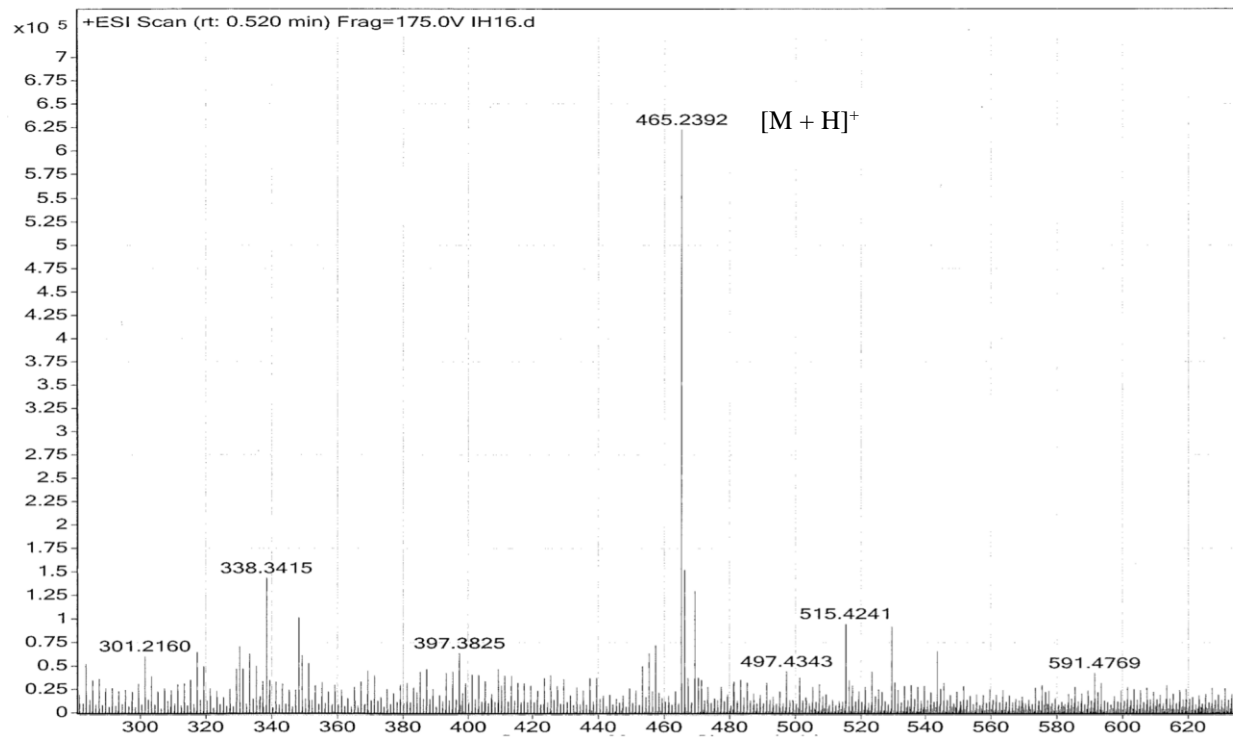

## HPLC Spectra of 6d

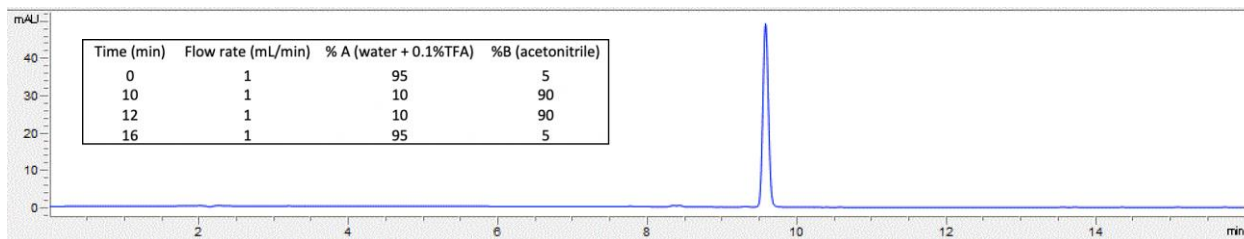

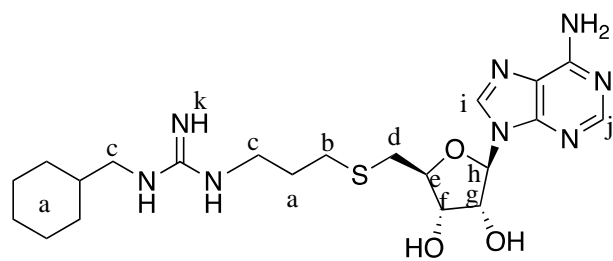

**6e**

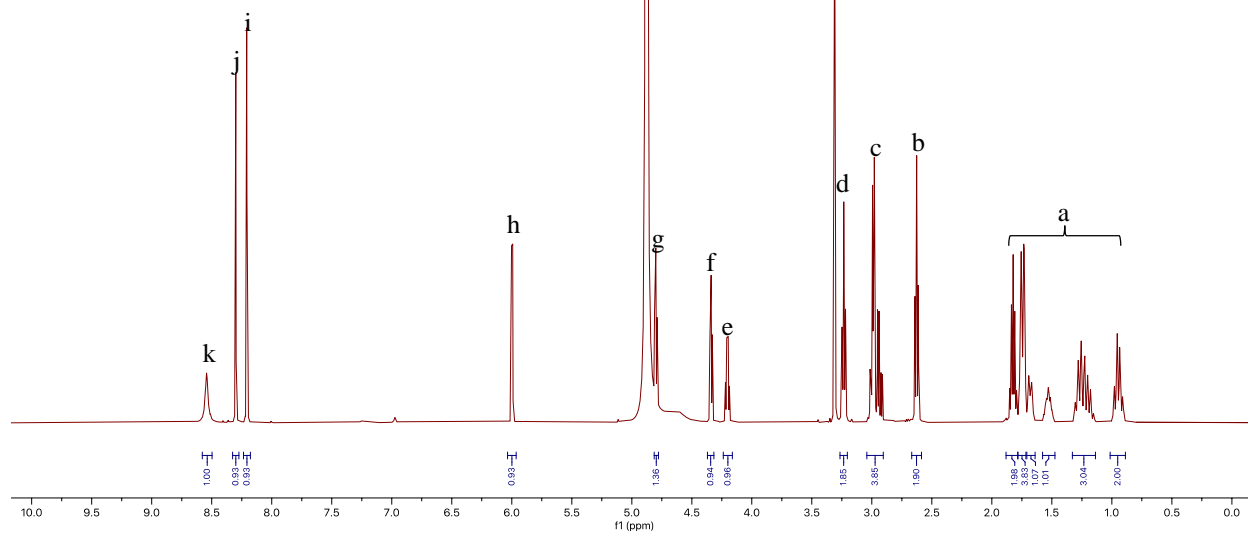

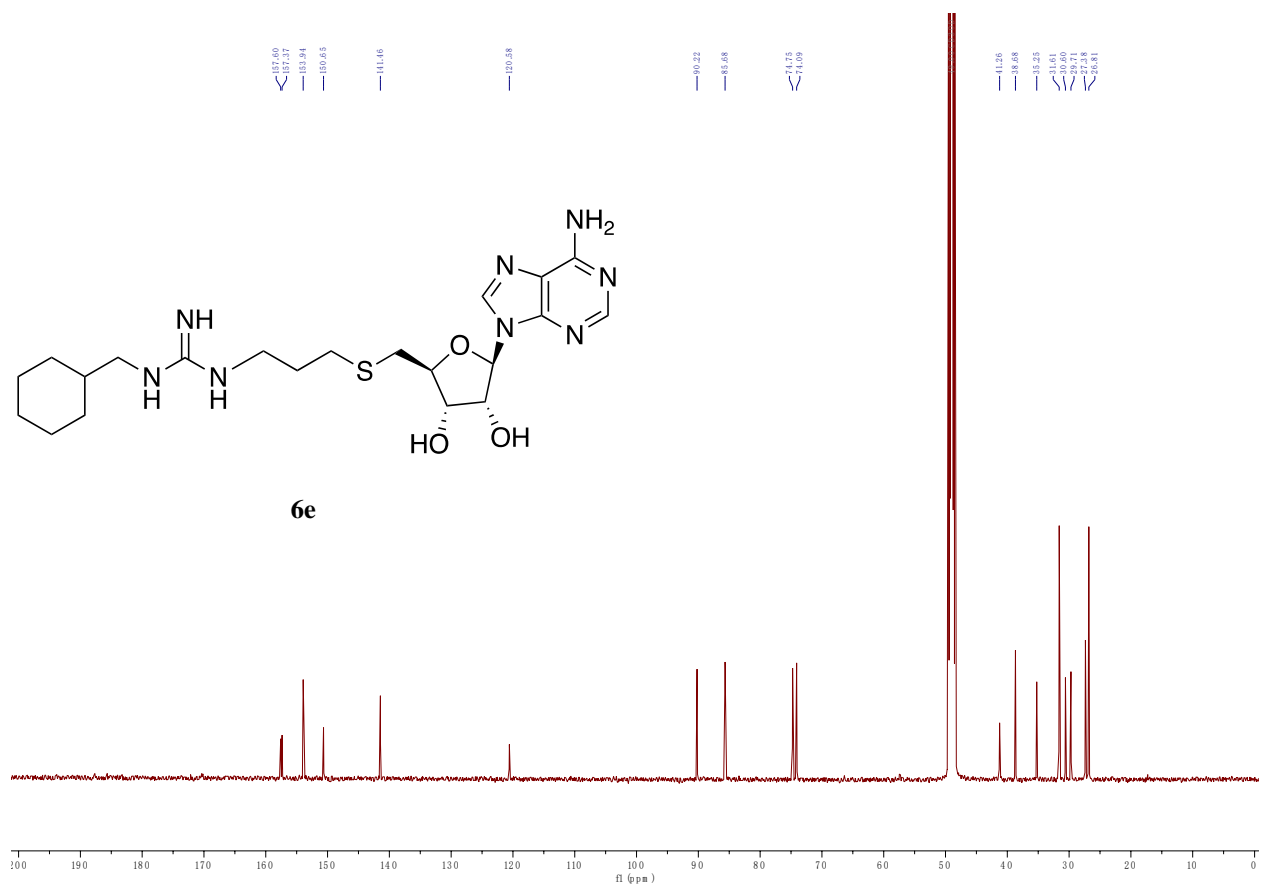

HRMS Spectra of **6e**

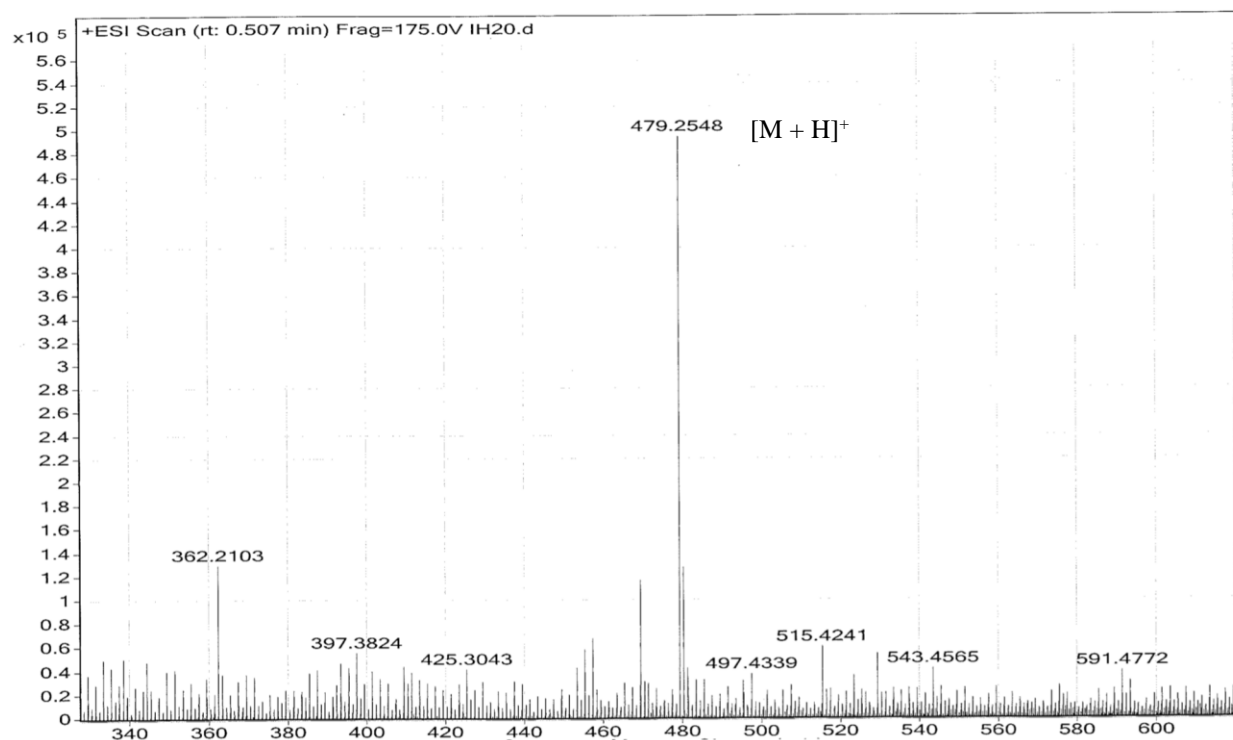

HPLC Spectra of 6e

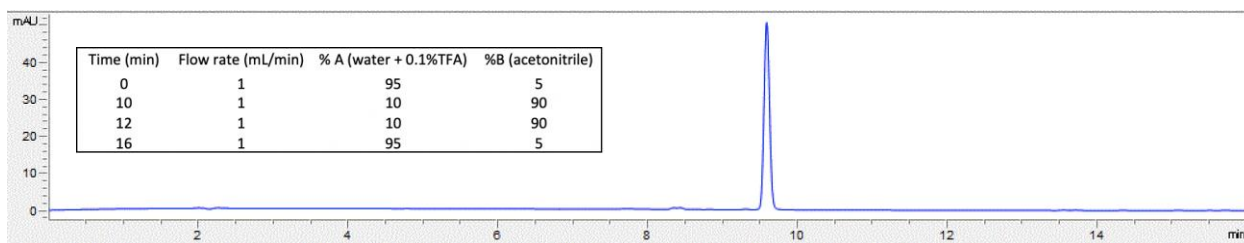



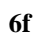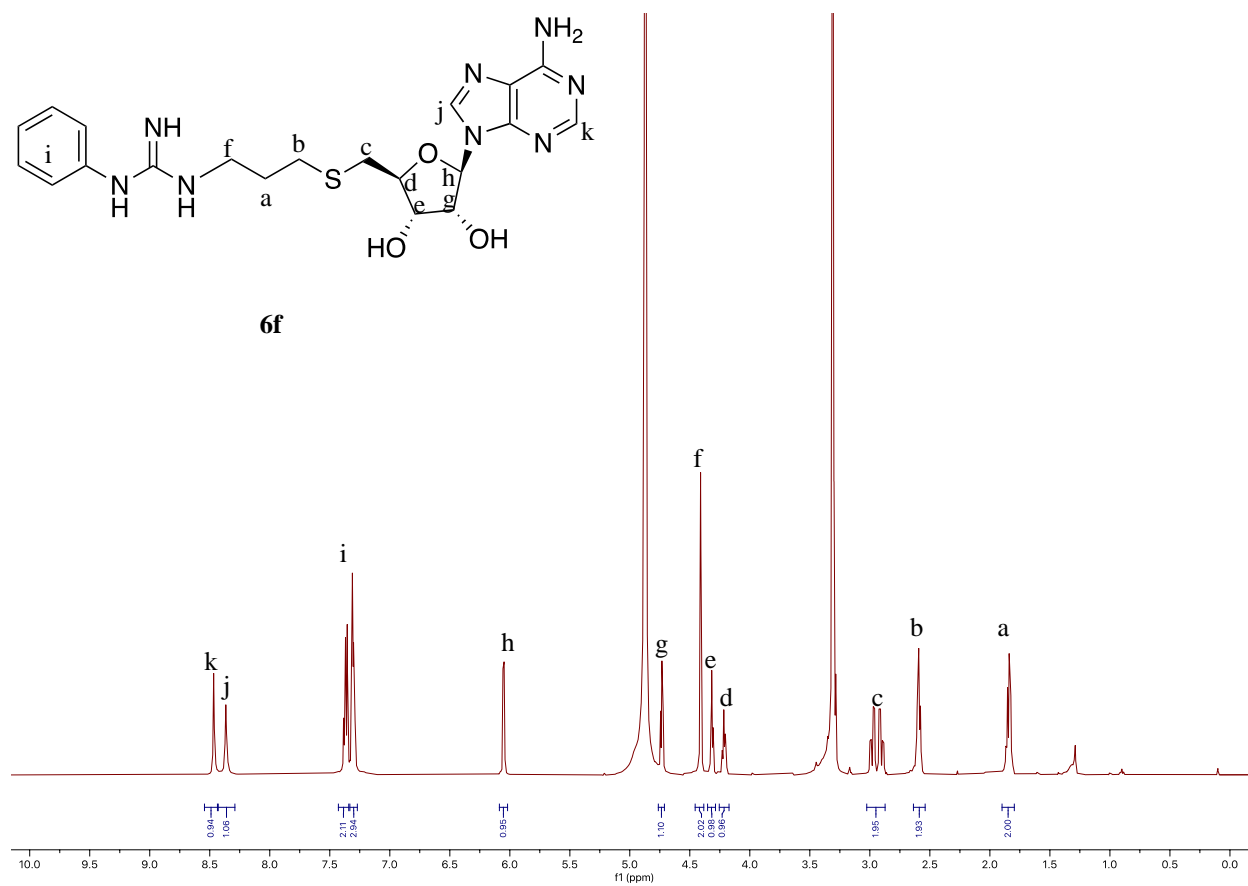

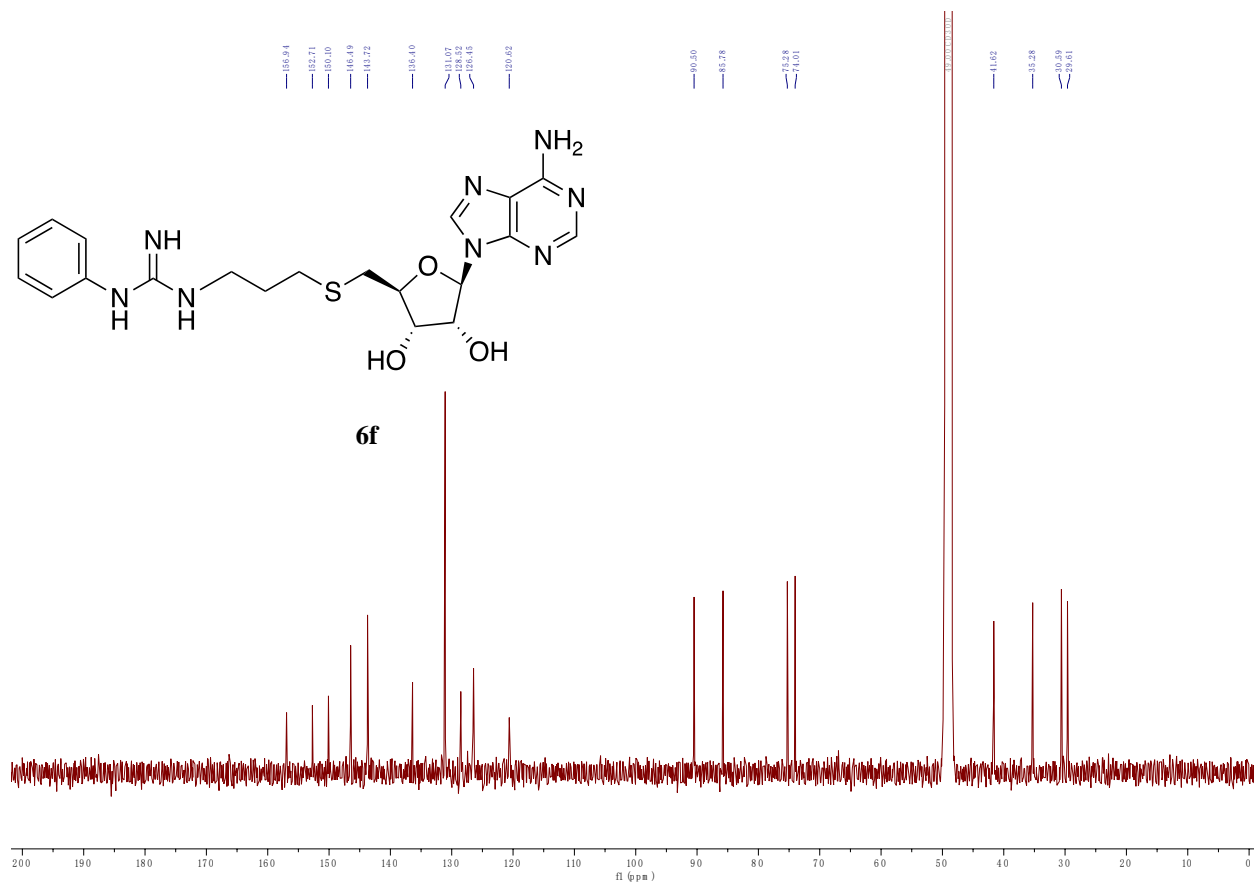

HRMS Spectra of **6f**

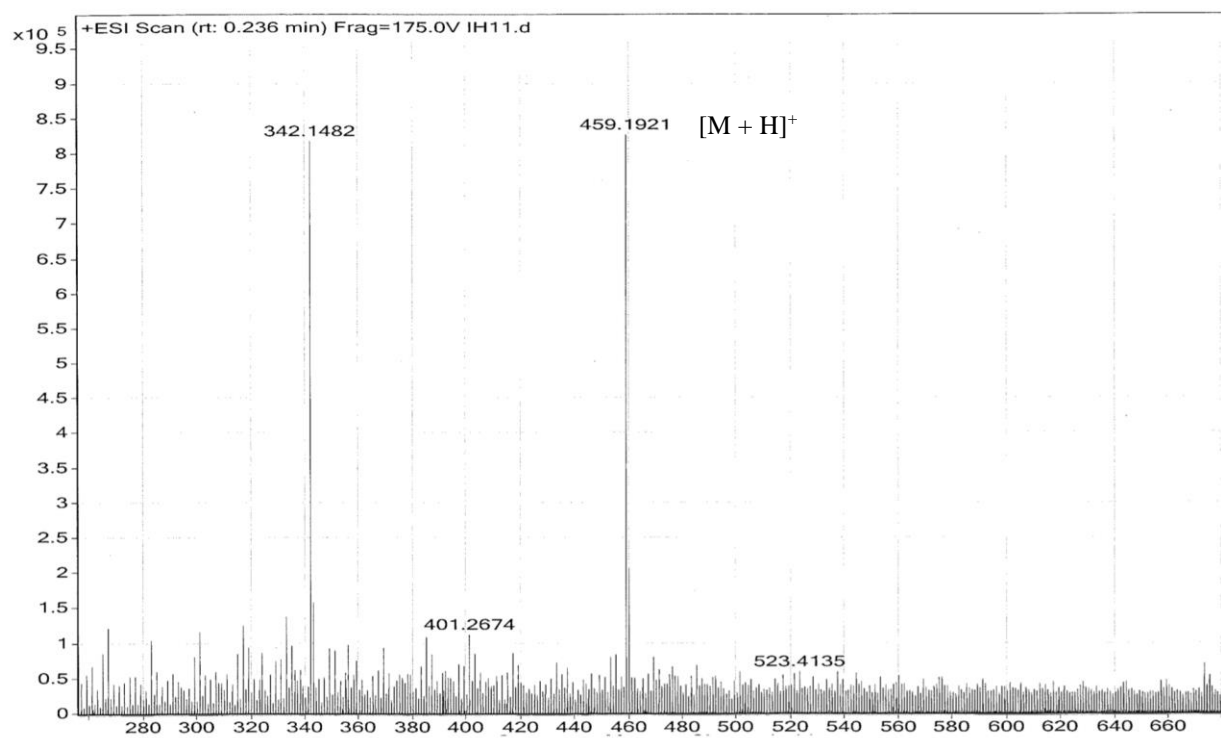

HPLC Spectra of 6f

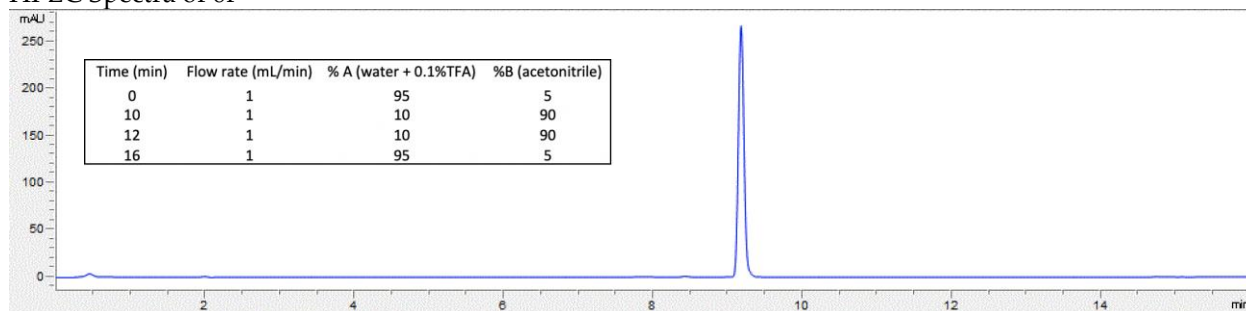

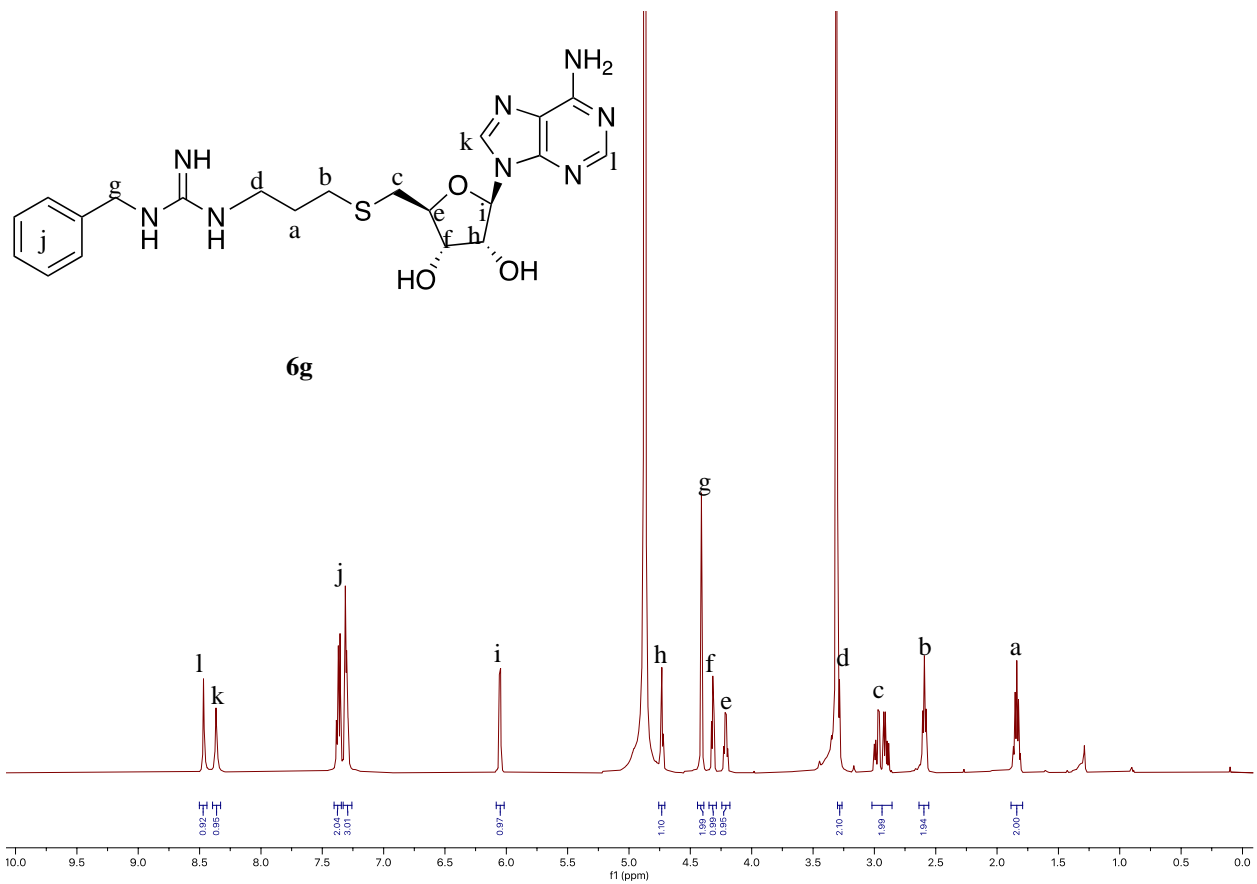

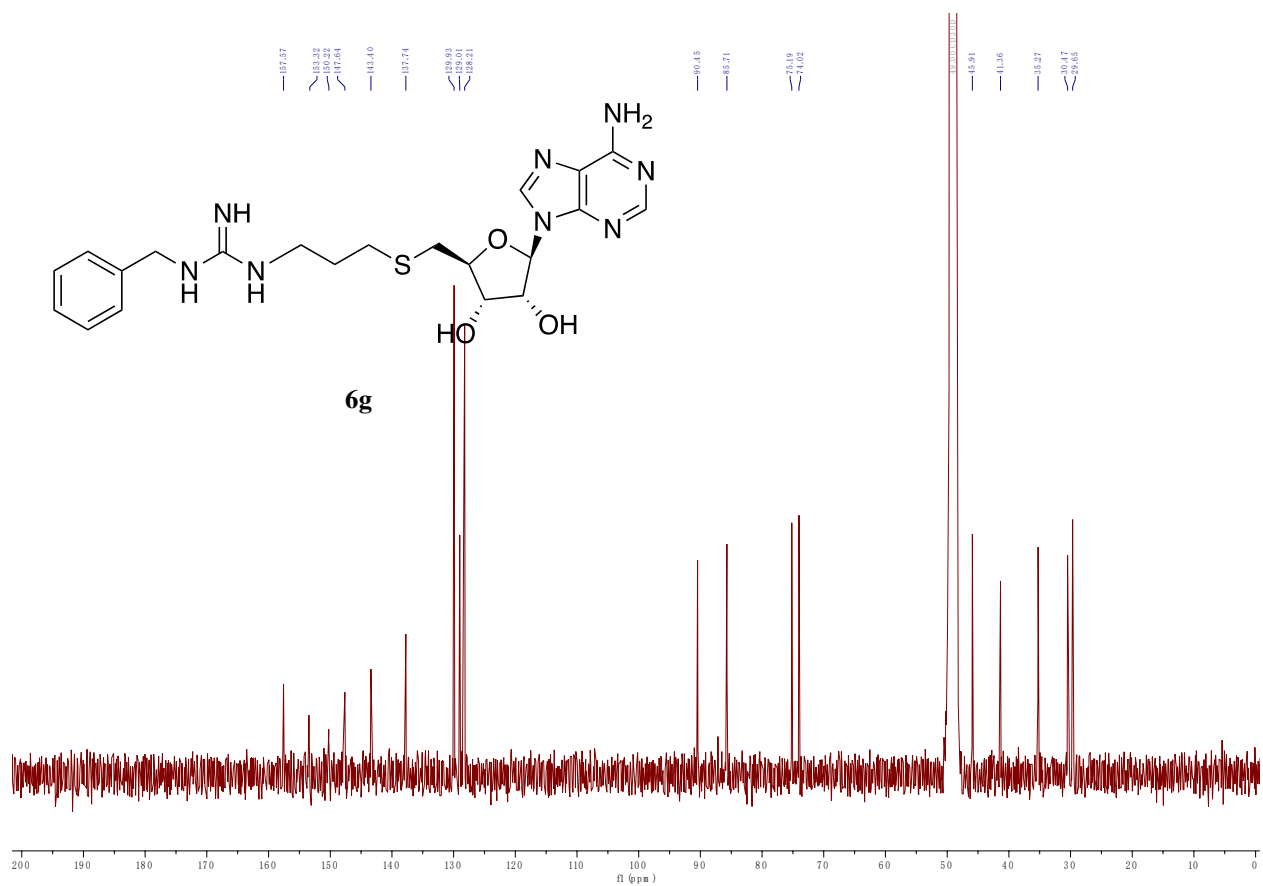

HRMS Spectra of **6g**

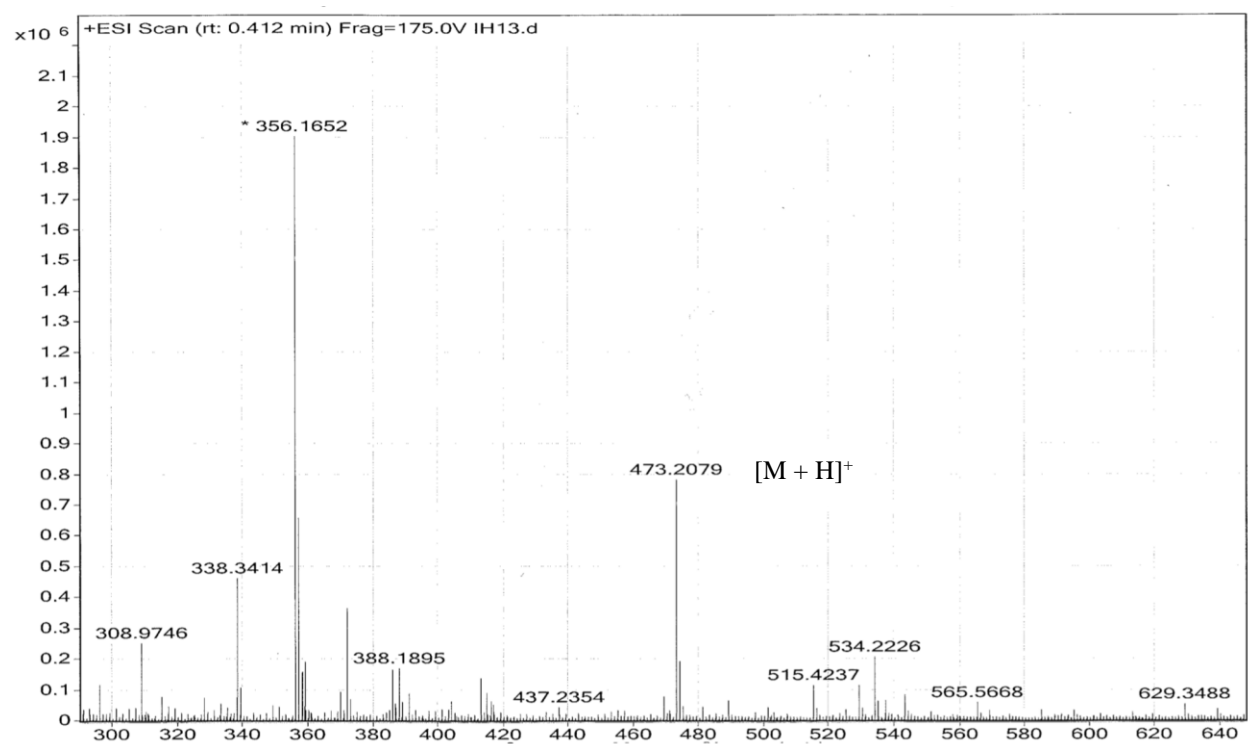

HPLC Spectra of 6g

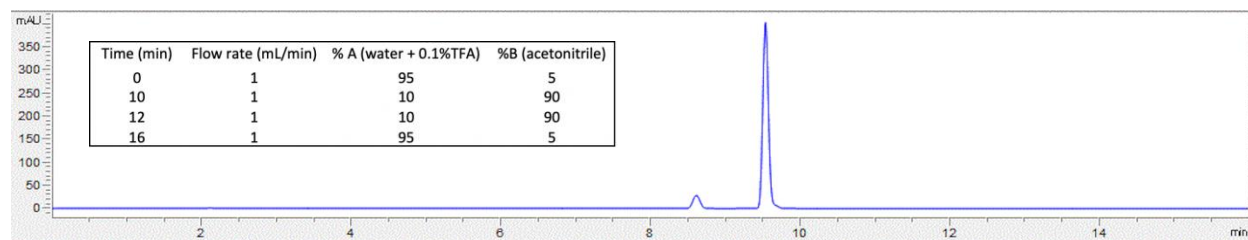

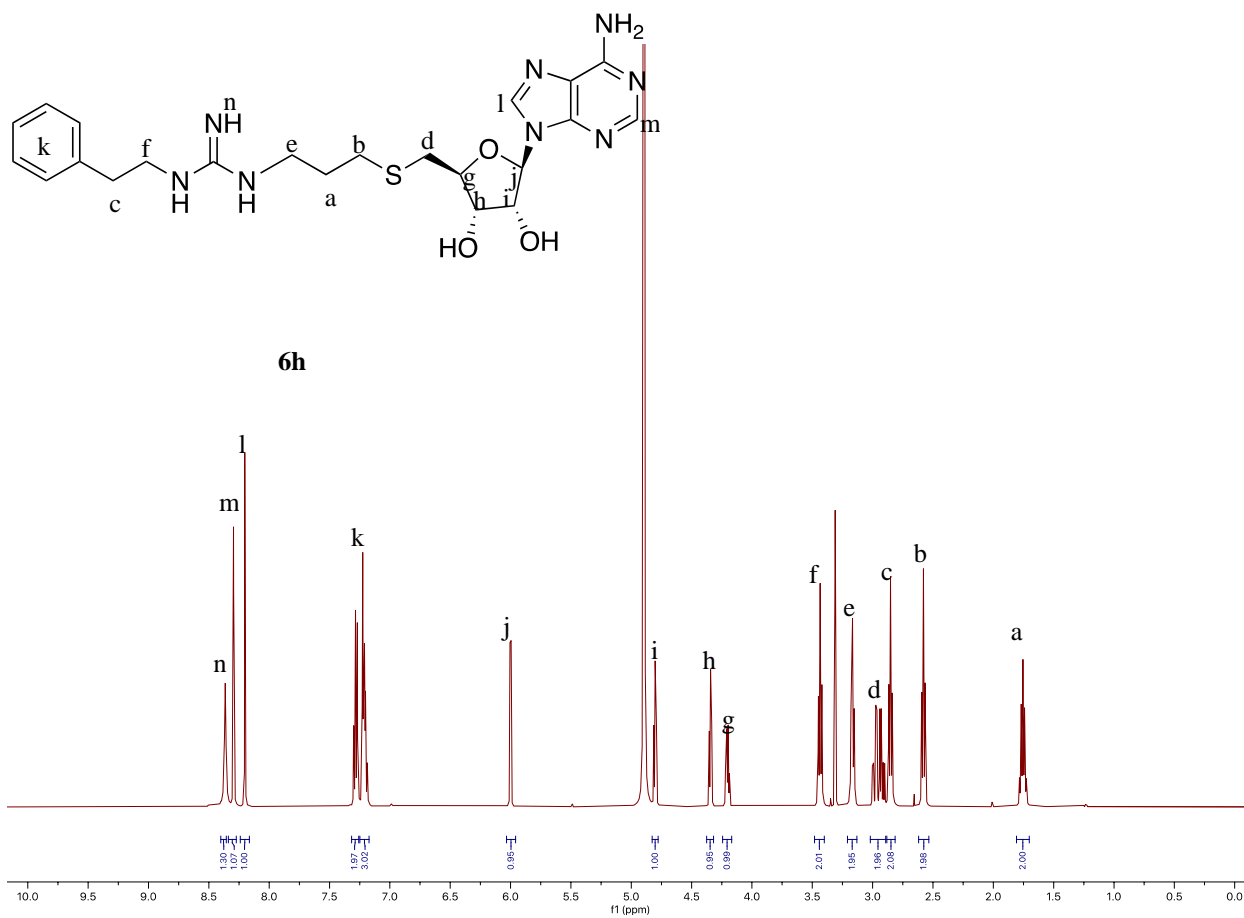

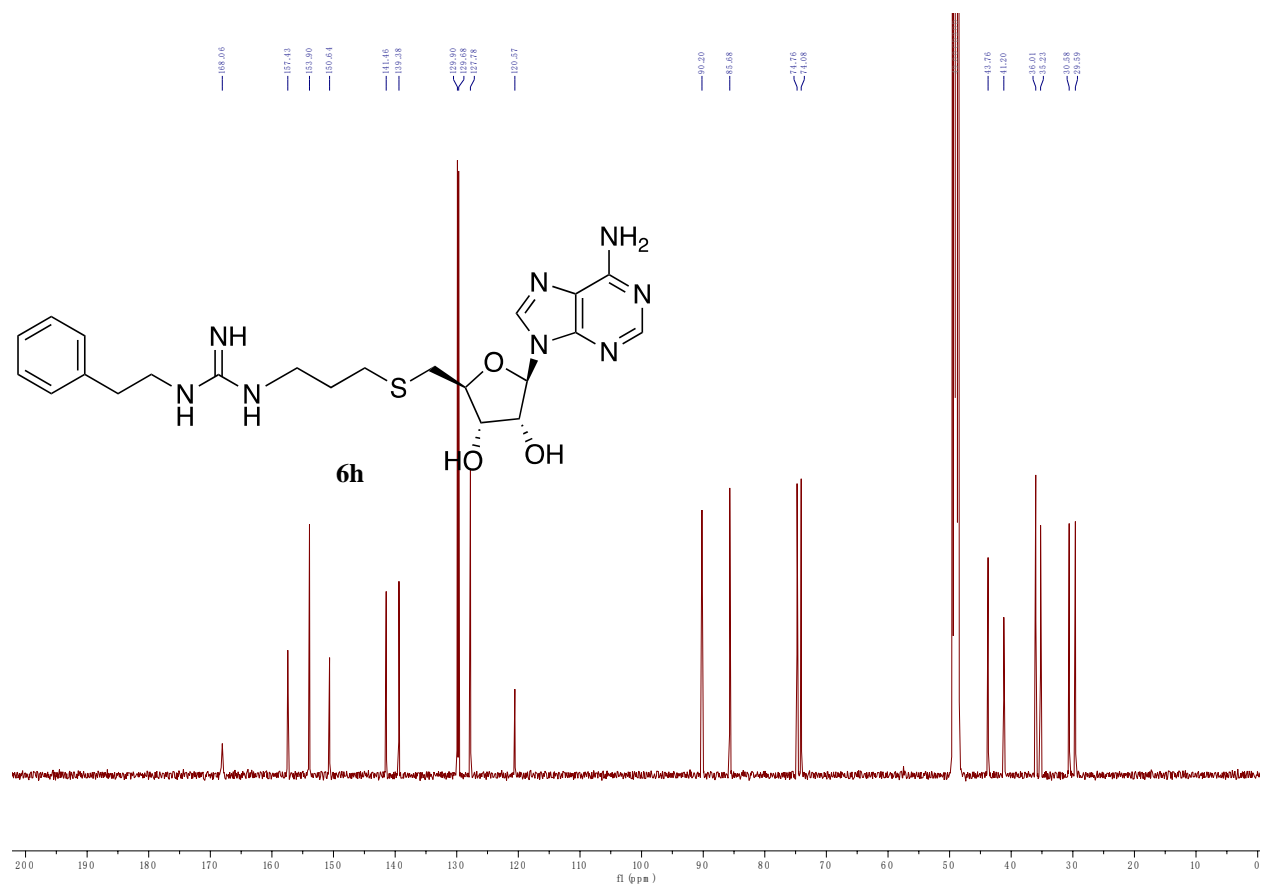

HRMS Spectra of **6h**



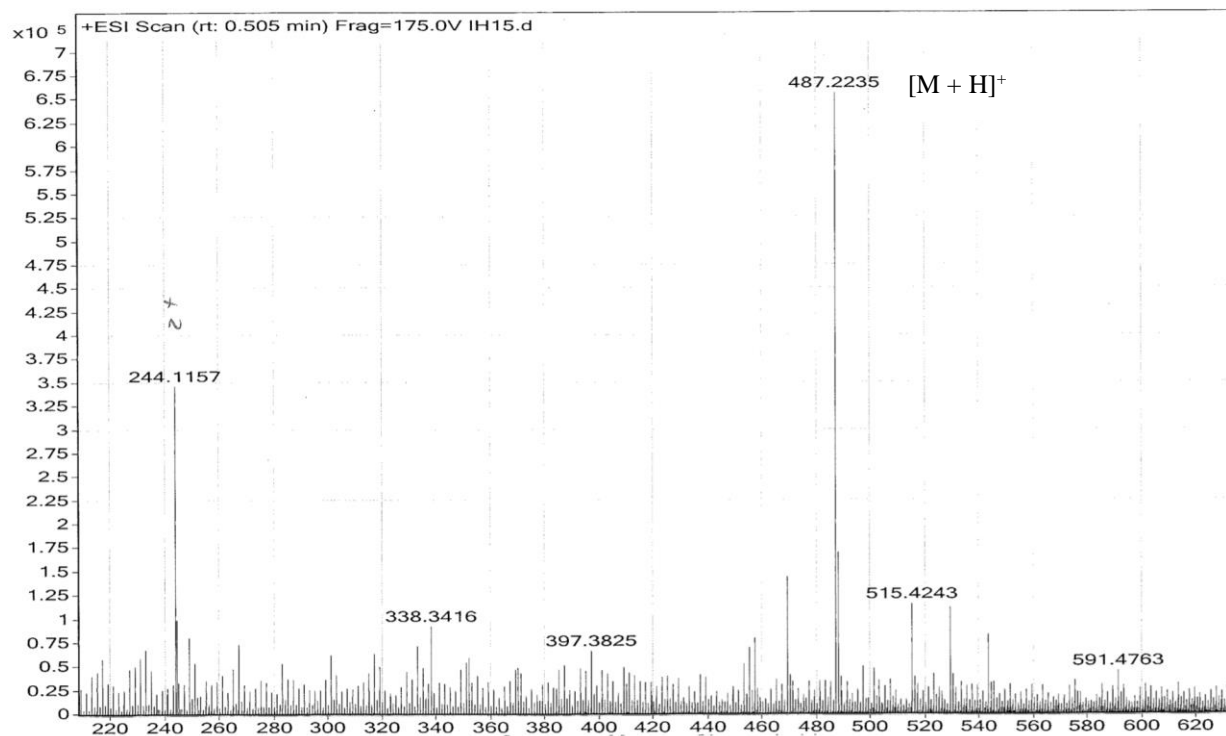

HPLC Spectra of 6h

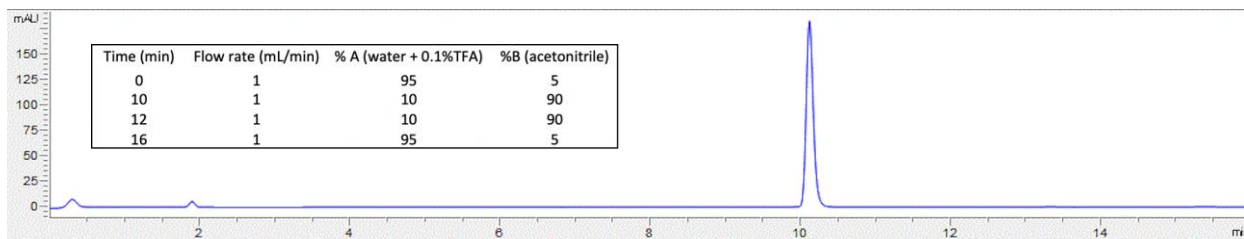

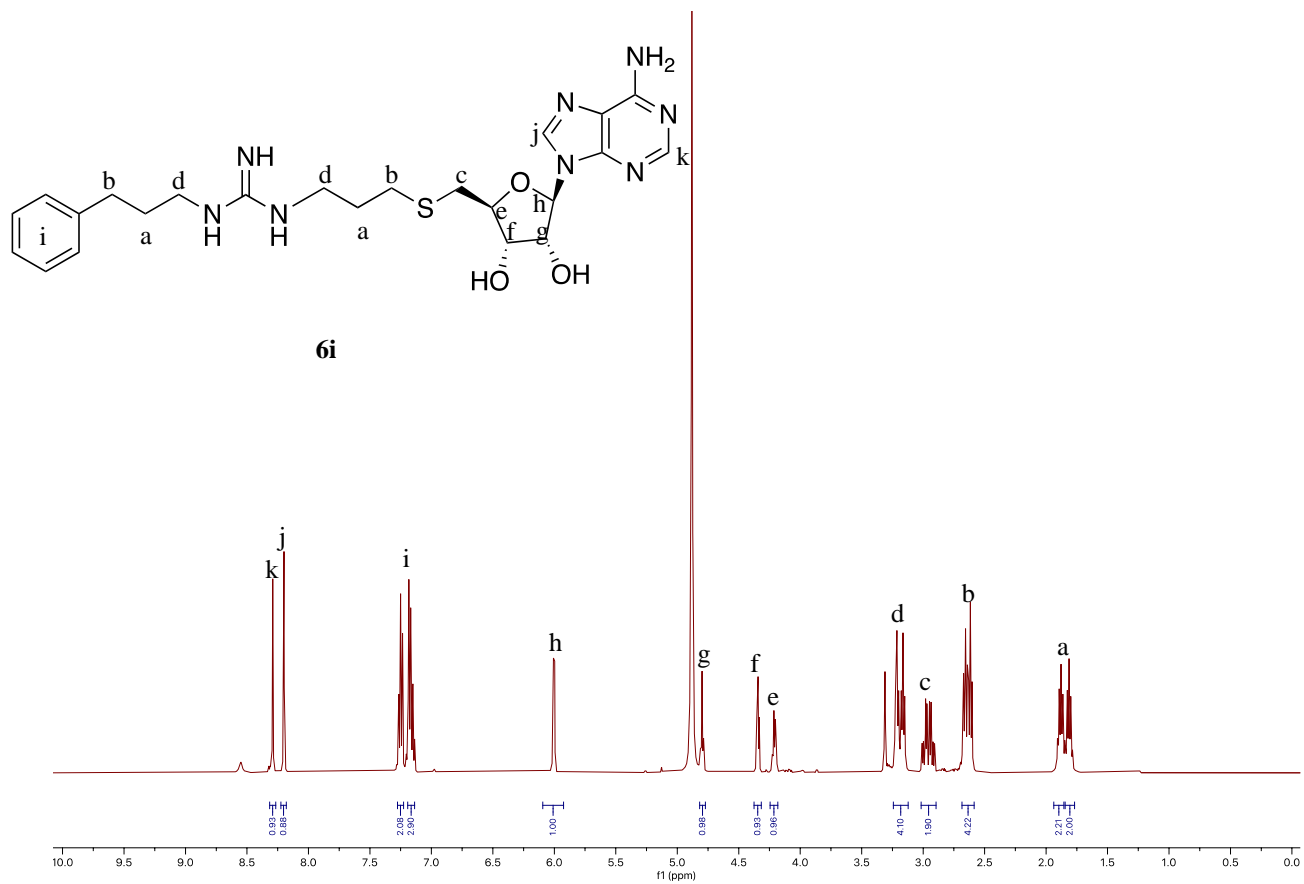

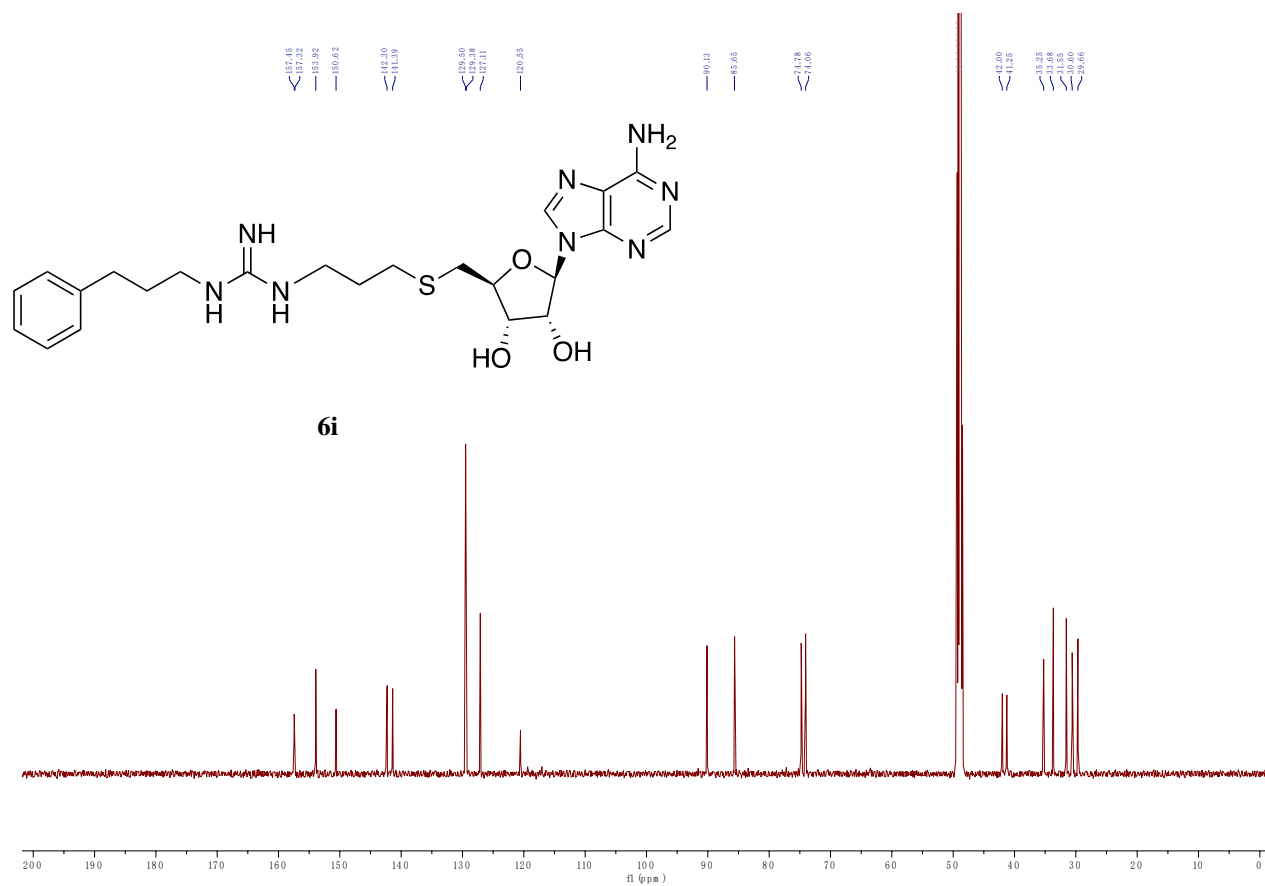

HRMS Spectra of **6i**

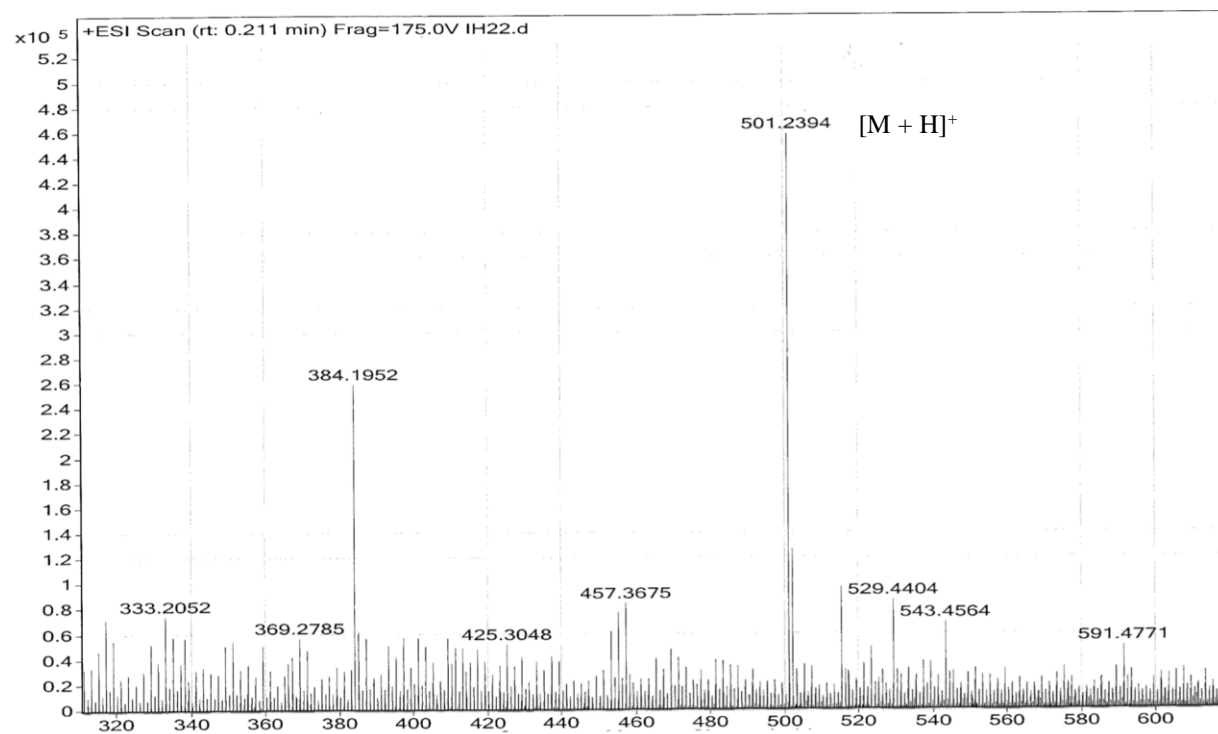

## HPLC Spectra of 6i

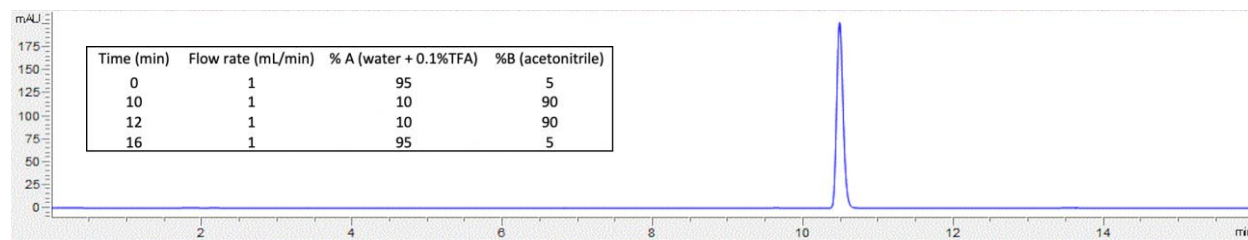

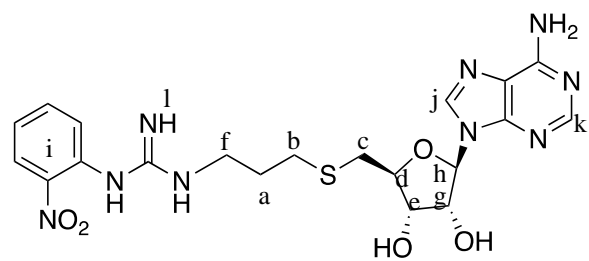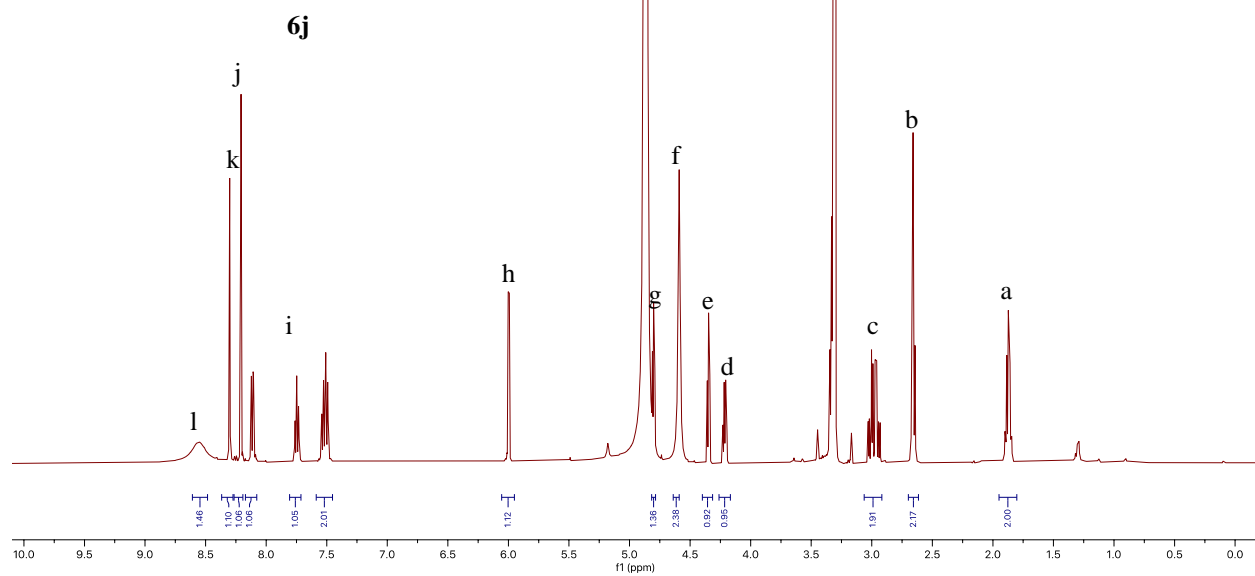

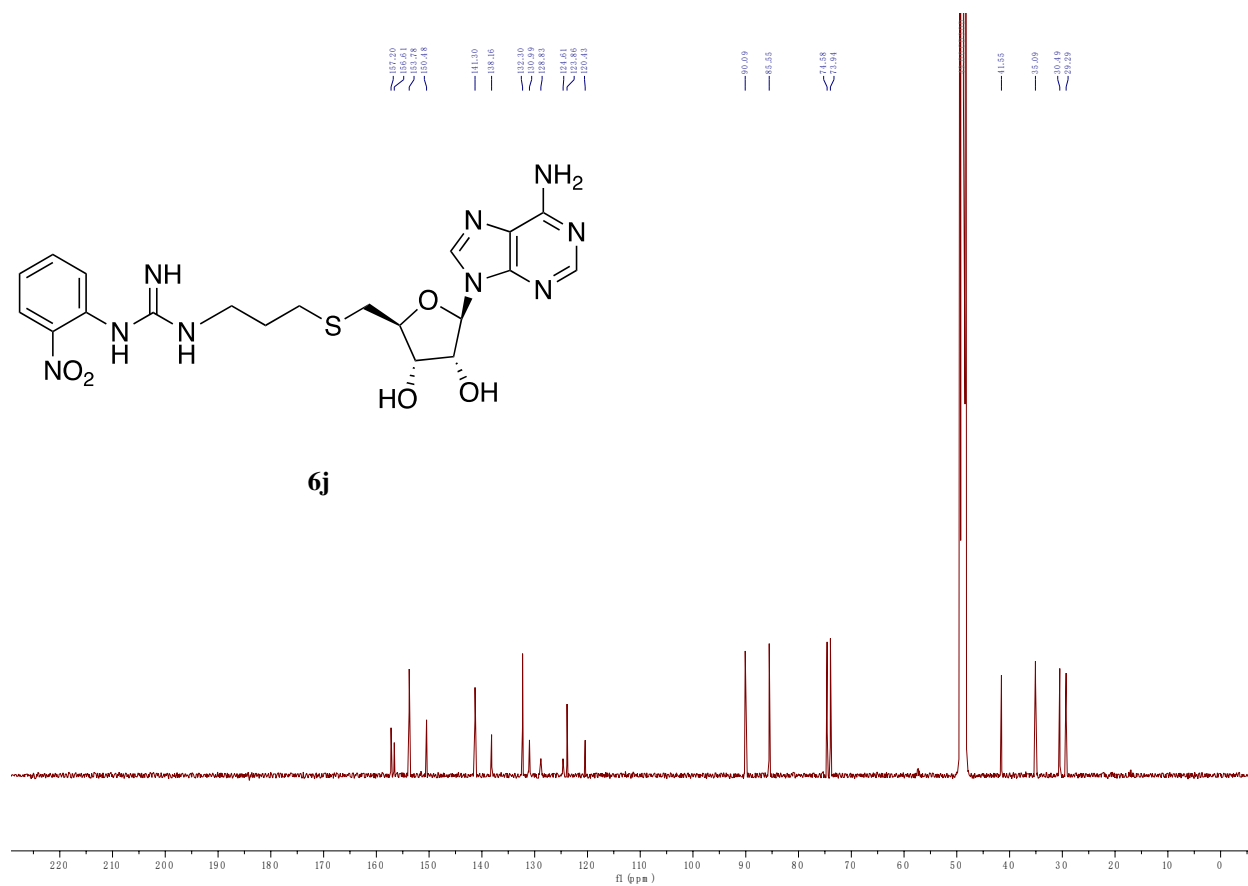

HRMS Spectra of **6j**

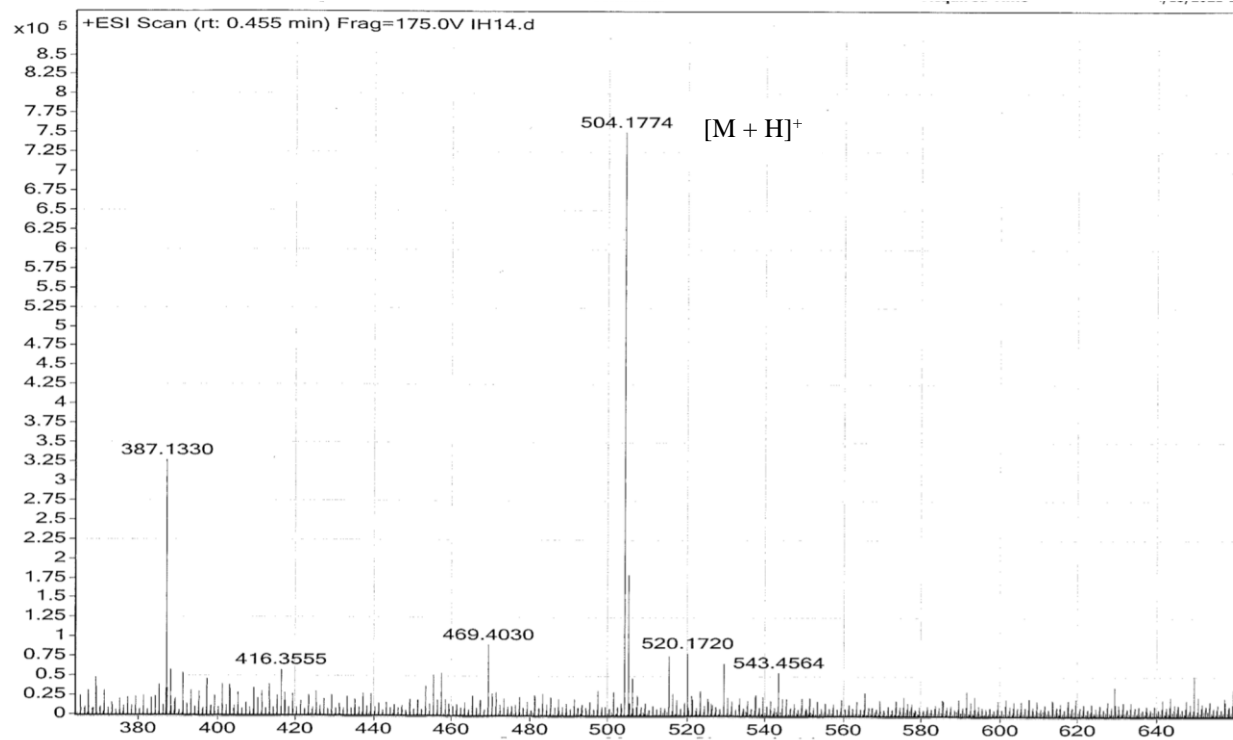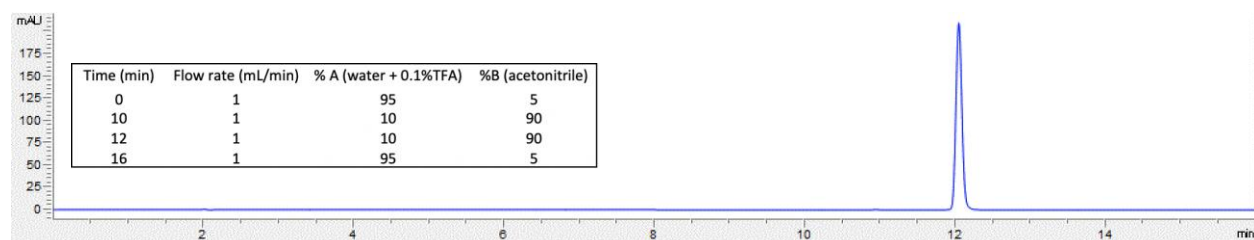

HPLC Spectra of 6j

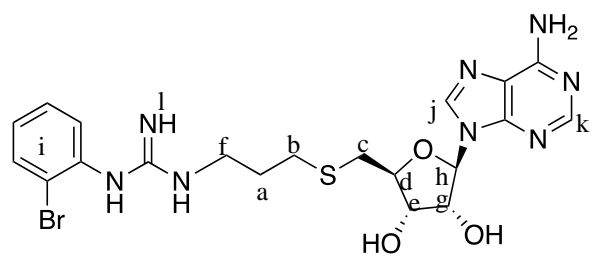

**6k**

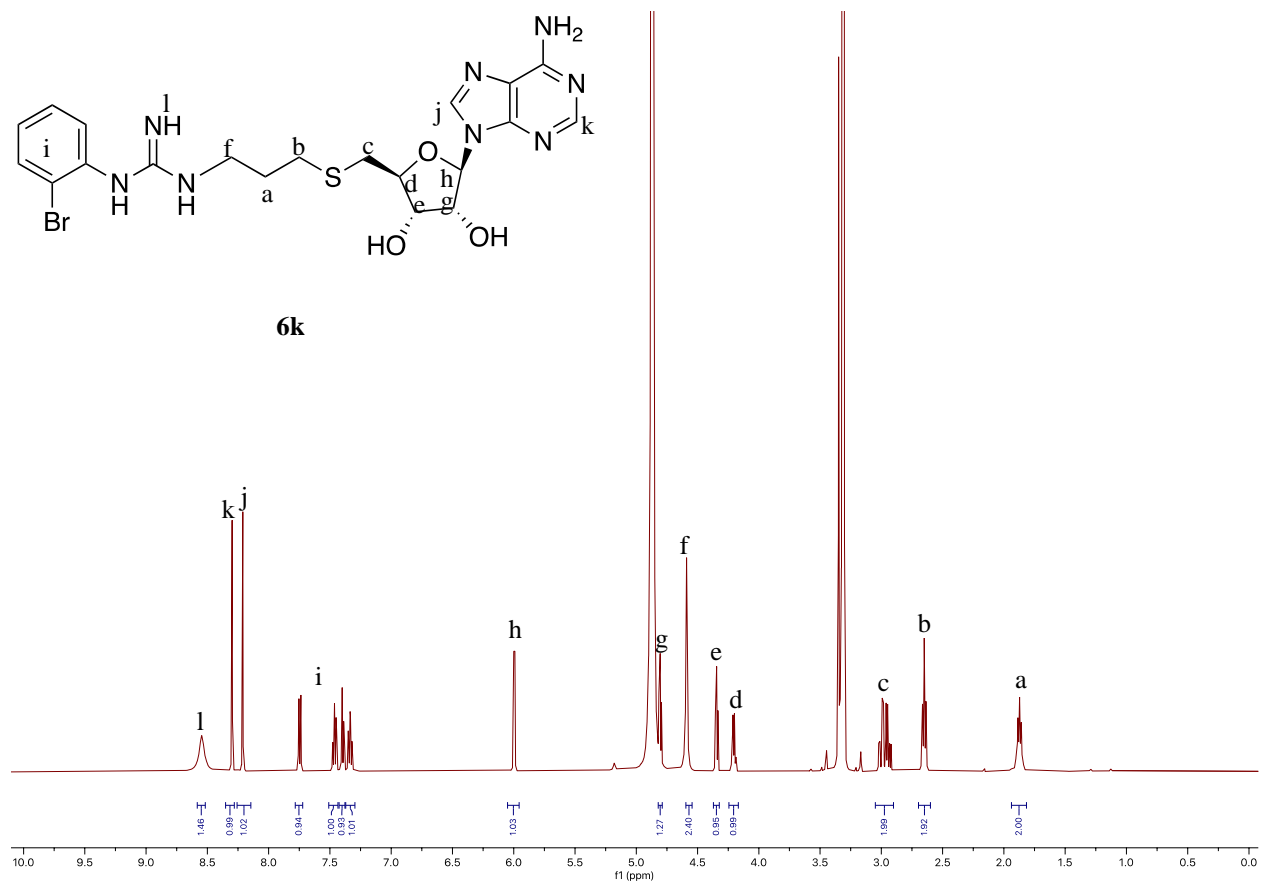



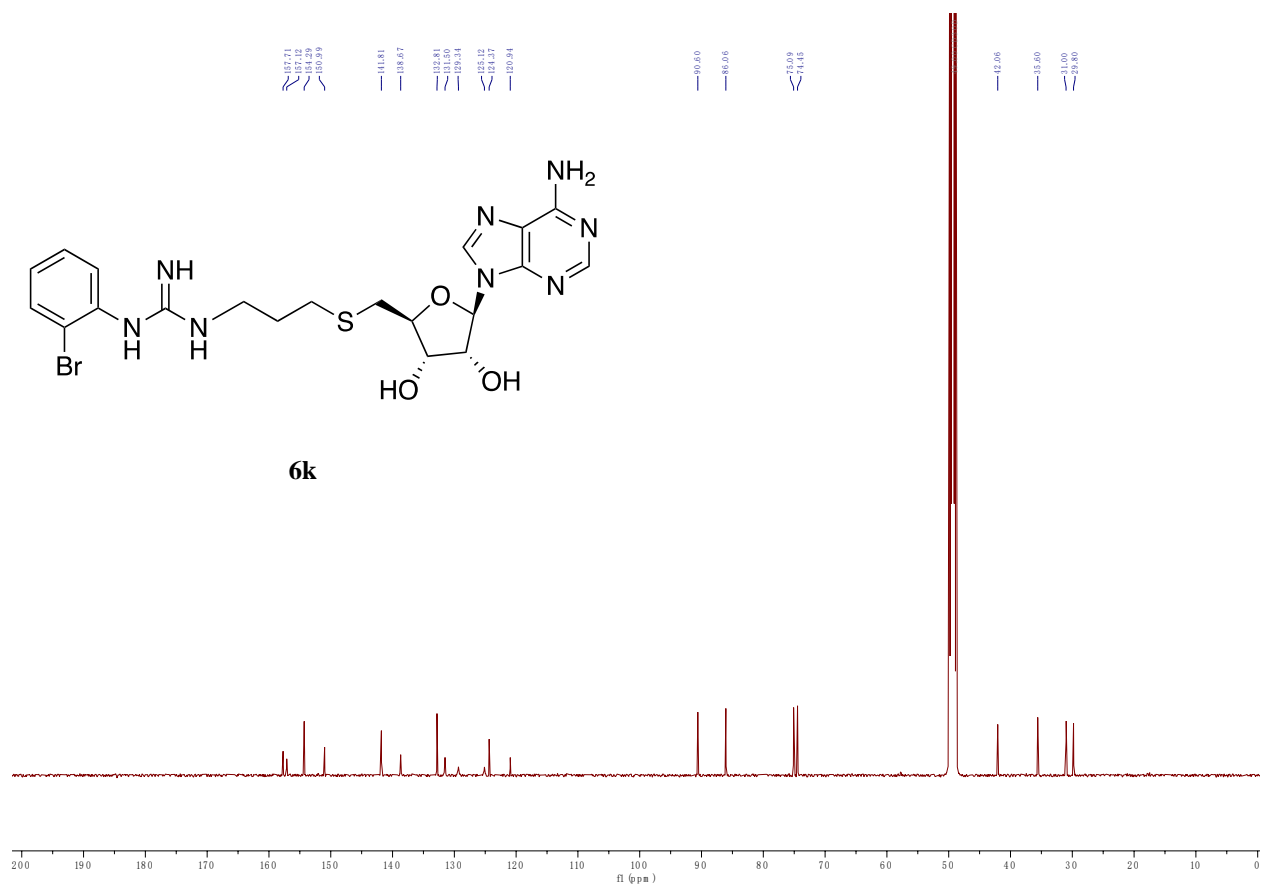

HRMS Spectra of 6k

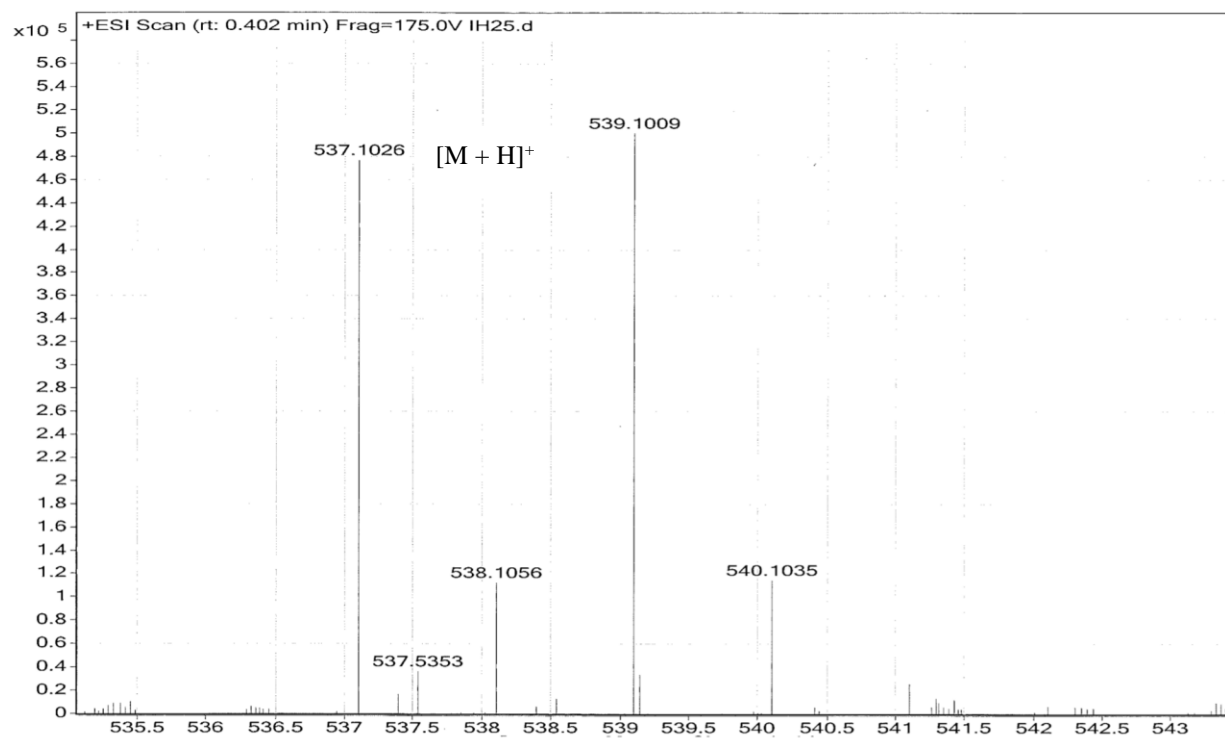

# HPLC Spectra of 6k

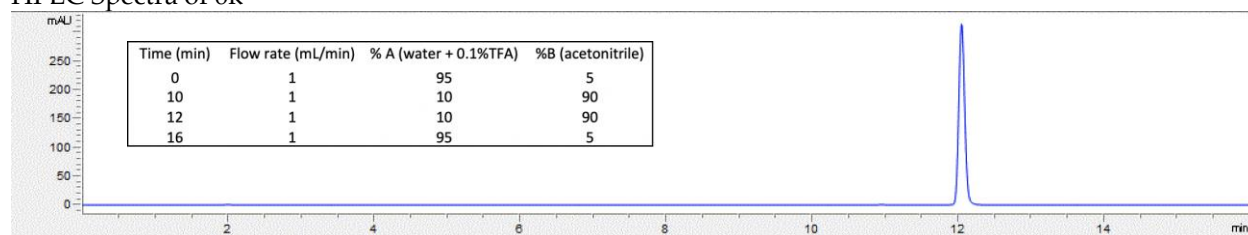

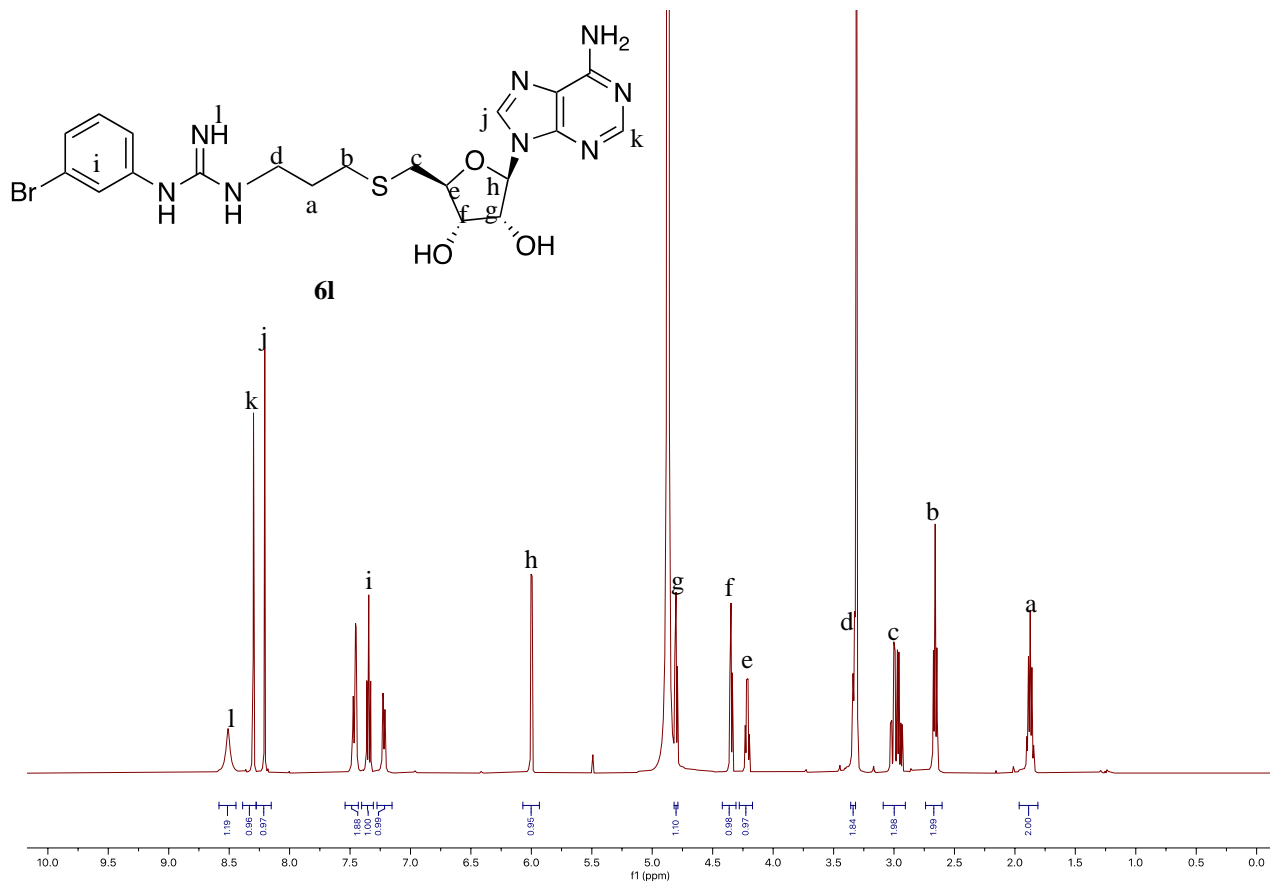

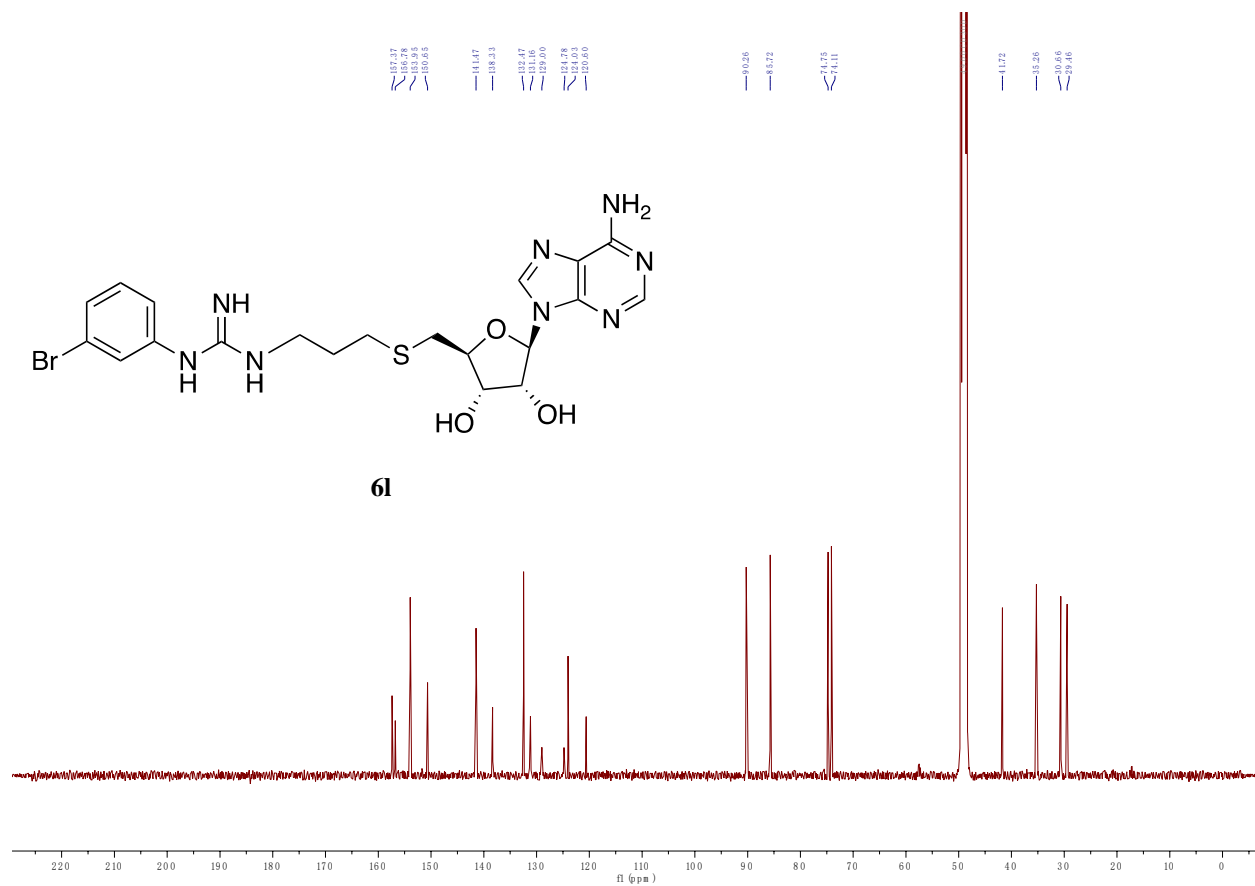

HRMS Spectra of **6l**

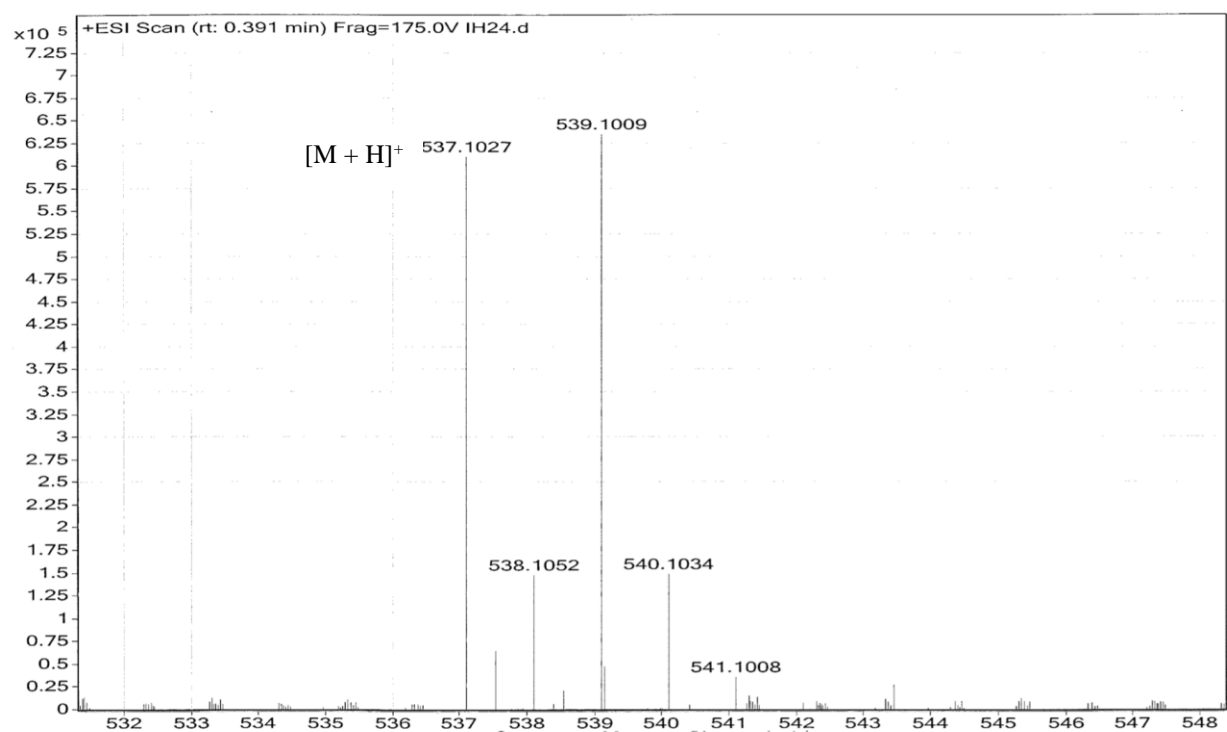

## HPLC Spectra of 6l

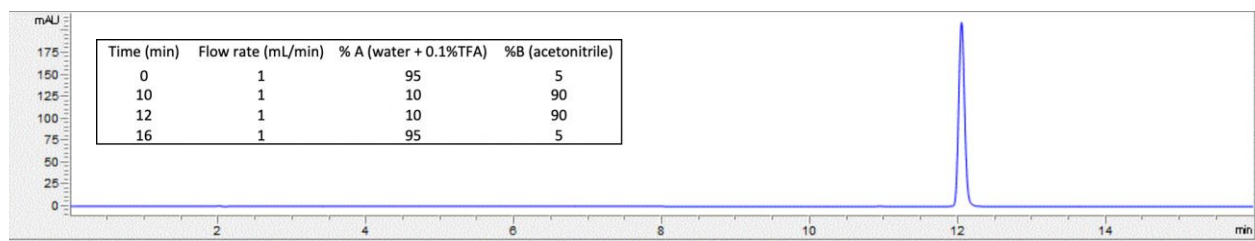

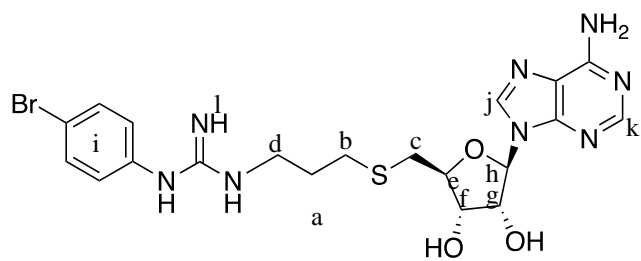

**6m**

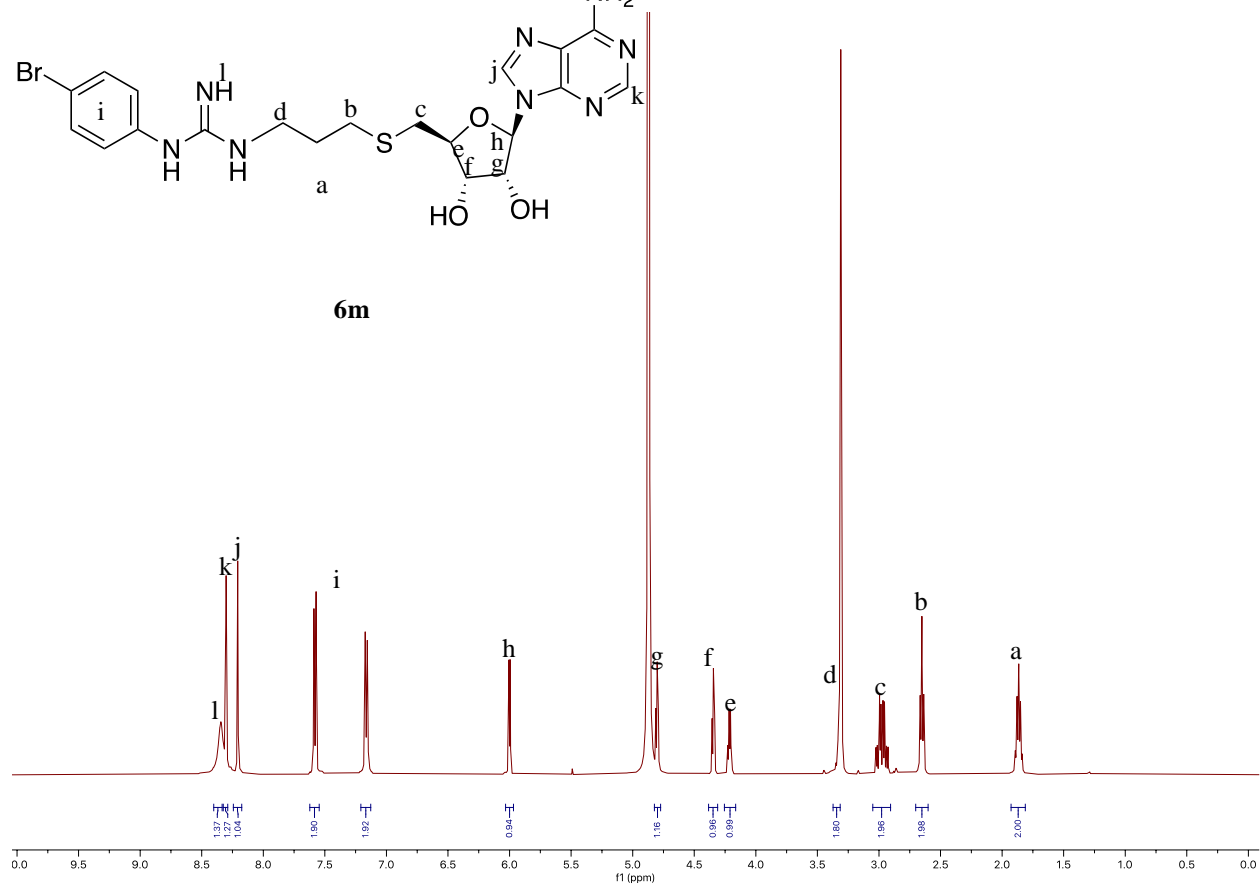

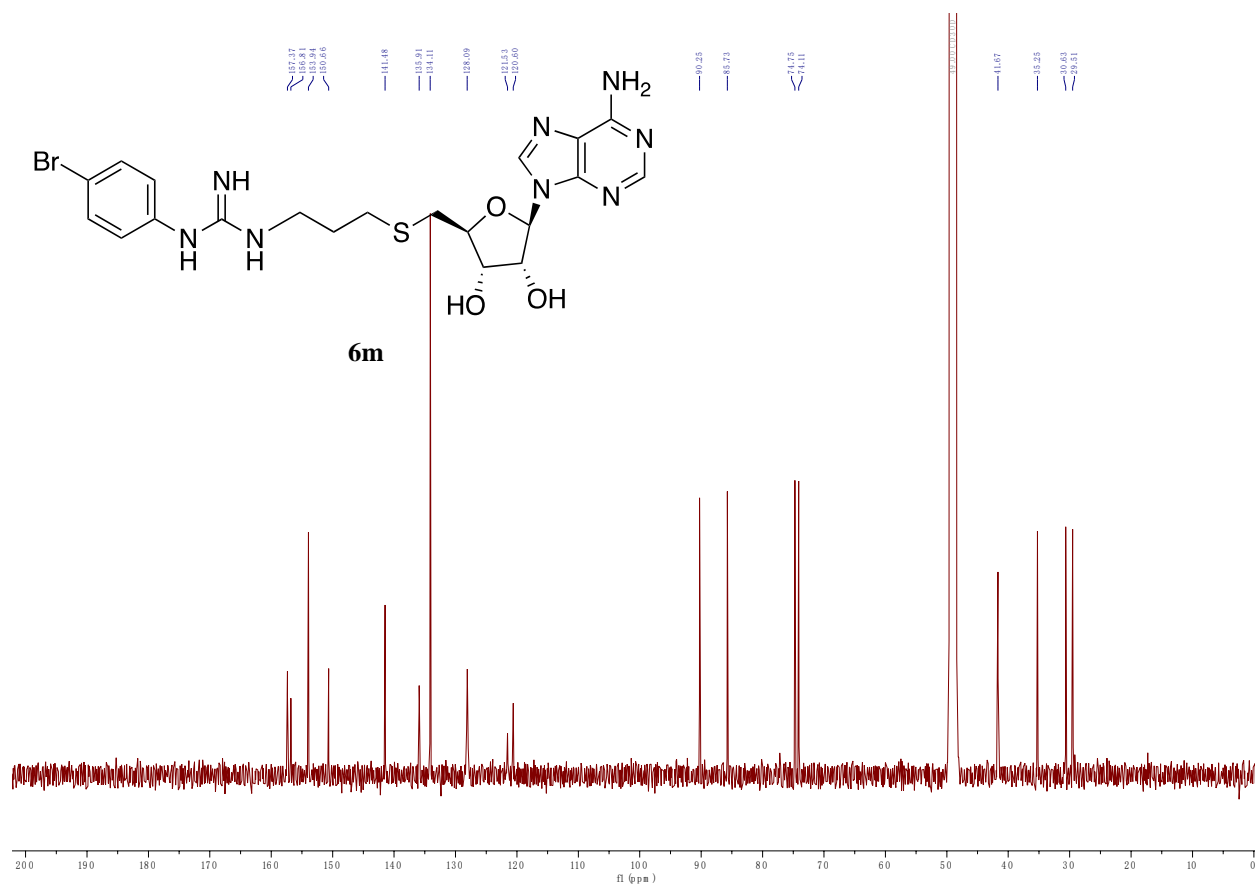

HRMS Spectra of **6m**

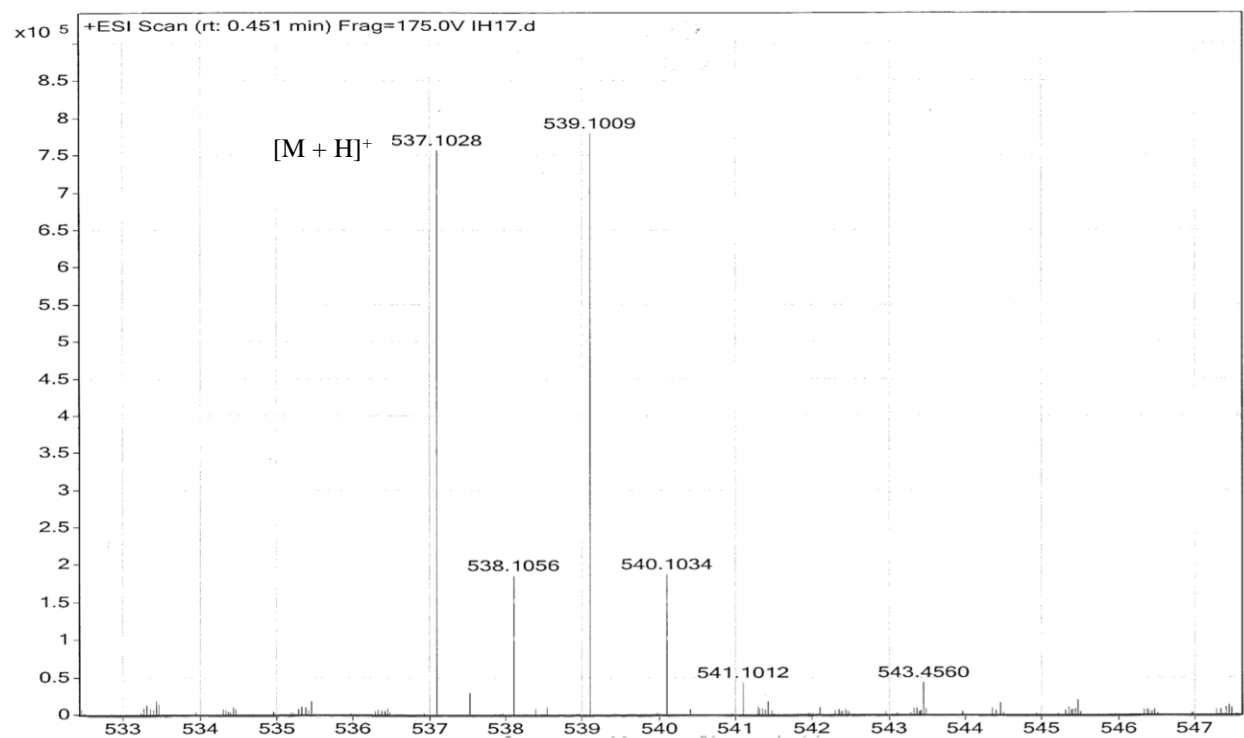

HPLC Spectra of 6m

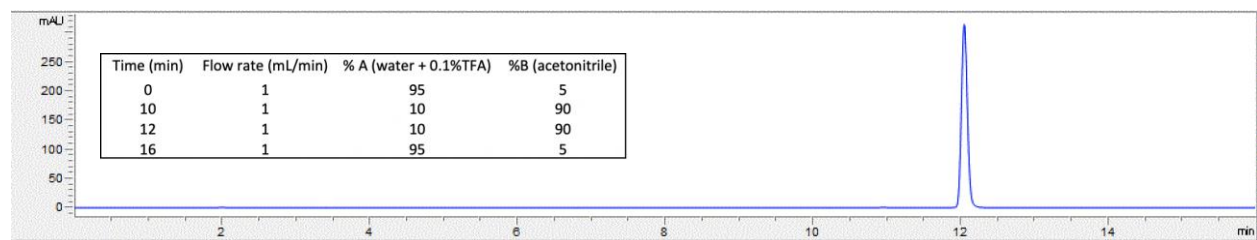



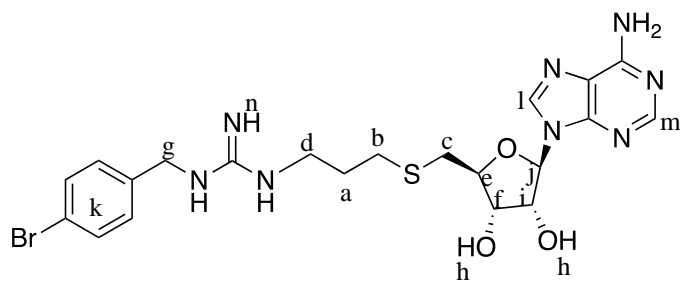

**6n**

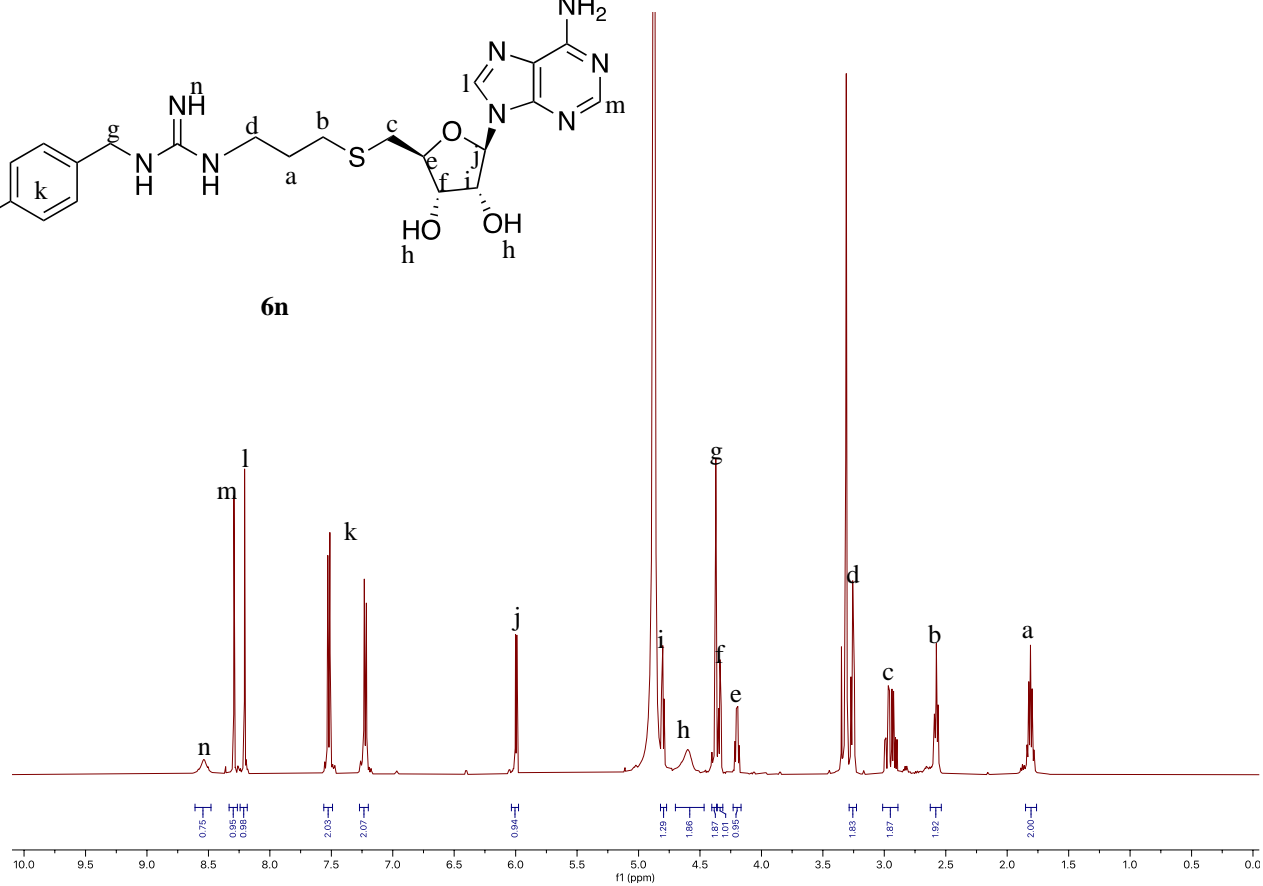

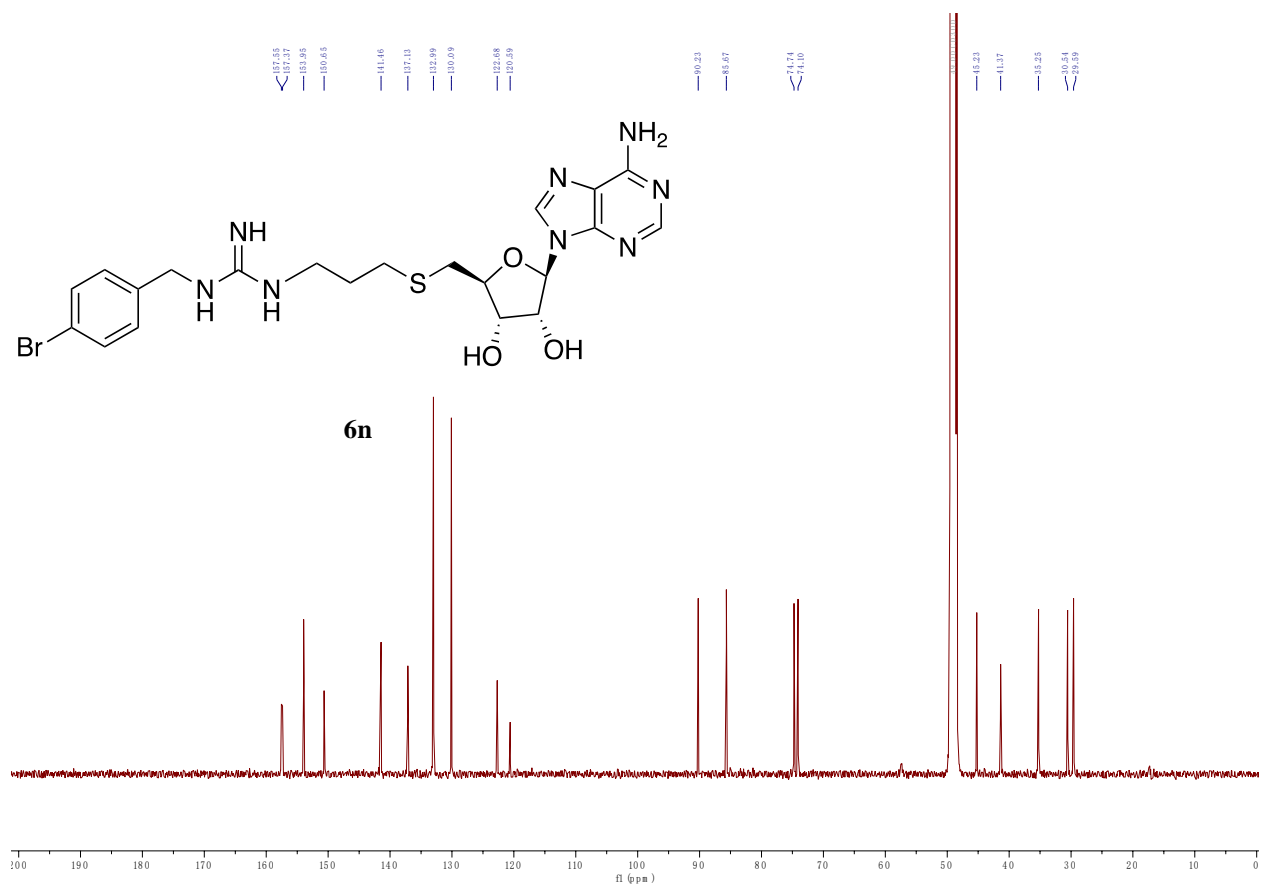

HRMS Spectra of **6n**

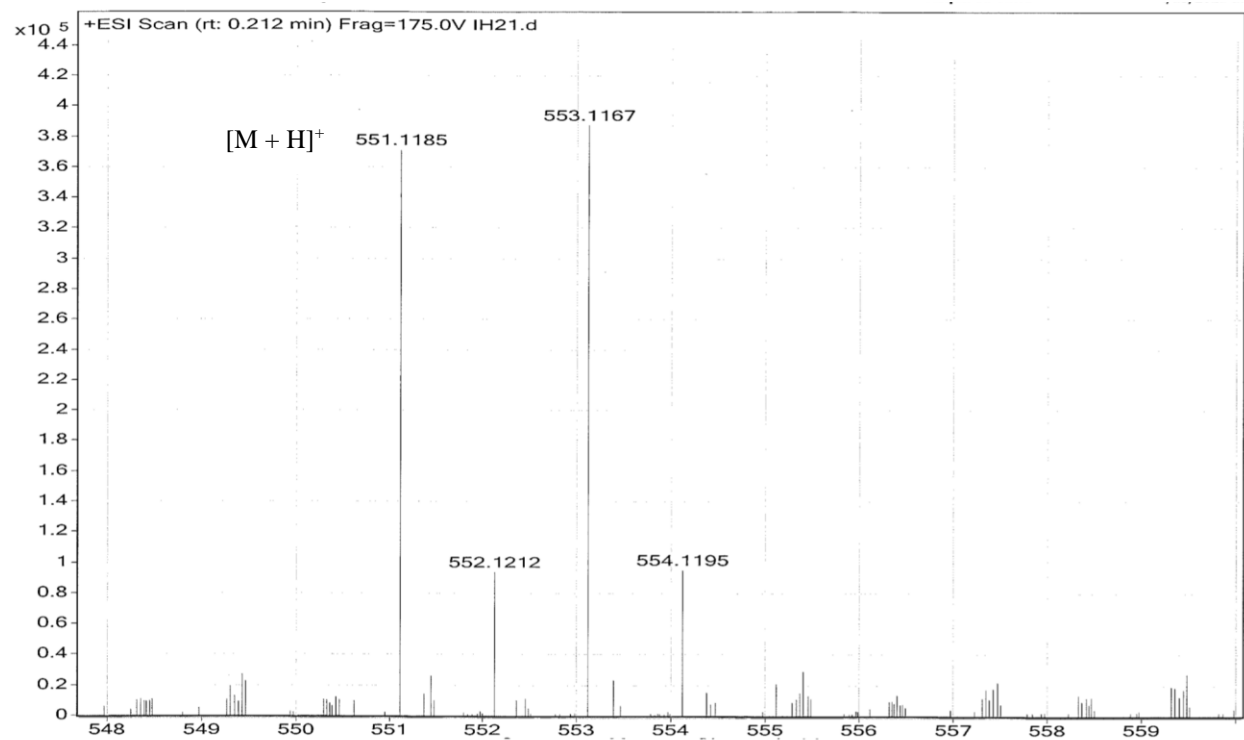

# HPLC Spectra of 6n

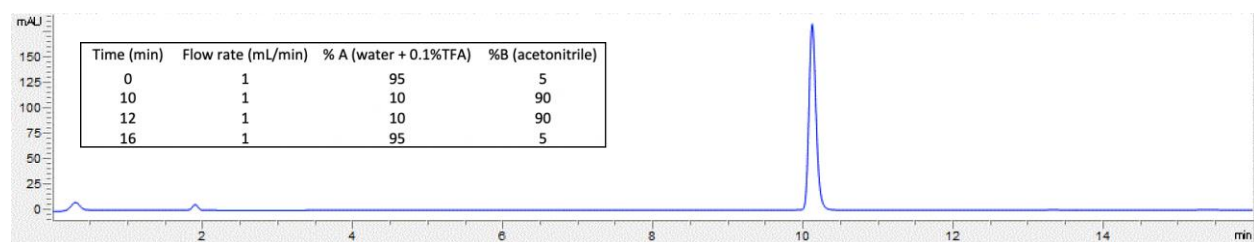

Supplement: s1 [file s1]
